# Supplementary material for: Complete biosynthesis of the bisbenzylisoquinoline alkaloids guattegaumerine and berbamunine in yeast
Source: PubMed Central journal article supplement — Proc Natl Acad Sci U S A. 2021 Dec 20;118(51):e2112520118. doi: 10.1073/pnas.2112520118 (PMC8713753; doi:10.1073/pnas.2112520118), 2021-12-20
Supplement: pnas.2112520118.sapp.pdf [file pnas.2112520118.sapp.pdf]

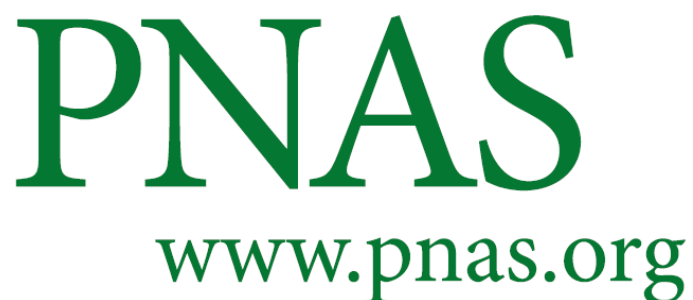

### **Supplementary Information for**

### **Complete biosynthesis of the bisbenzylisoquinoline alkaloids guattegaumerine and berbamunine in yeast**

James T. Payne<sup>1†</sup> and Timothy R. Valentic<sup>1†</sup>, and Christina D. Smolke<sup>1,2\*</sup>

<sup>1</sup>Department of Bioengineering, Stanford University, 443 Via Ortega, MC 4245, Stanford, CA, 94305, USA

<sup>2</sup>Chan Zuckerberg Biohub, 499 Illinois St, San Francisco, CA, 94158, USA

\*Corresponding author

†These authors contributed equally to this work

Email: [csmolke@stanford.edu](mailto:csmolke@stanford.edu)

#### **This PDF file includes:**

Supplementary Materials and Methods  
Figures S1 to S9  
Tables S1 to S7  
SI References

## Supplementary Materials and Methods

### Chemical compounds and standards

Guattegaumerine and berbaminine were provided by Toni Kutchan. (*R*)-*N*-methylcoclaurine was purchased from BOC Sciences. All other chemicals were purchased from Sigma.

### Yeast strain construction

Strains used in this work are listed in Table S1. All strains used are derived from the previously reported strain CSY1171 (10). Strains were grown non-selectively in yeast-peptone media supplemented with 2% w/v dextrose (YPD media), yeast nitrogen base (YNB) defined media (Becton, Dickinson and Company, BD) supplemented with synthetic complete amino acid mixture (YNB-SC; Clontech) and 2% w/v dextrose, or on agar plates made using the aforementioned media. Strains transformed with plasmids bearing auxotrophic selection markers (*URA3* and/or *TRP1*) were grown selectively in YNB media supplemented with 2% w/v dextrose and the appropriate dropout media (YNB-DO; Clontech) or on YNB-DO agar plates.

Yeast genomic modifications were performed using the CRISPRm method (48). Oligonucleotides used in this work (Table S2) were synthesized by the Stanford Protein and Nucleic Acid Facility (Stanford, CA). Biosynthetic genes used in this study (Table S3) were codon-optimized using GeneArt Gene Optimizer software (Thermo Fisher Scientific) either for expression in *S. cerevisiae* or *E. coli* (Table S7) and then synthesized as either gBlock DNA fragments (Integrated DNA Technologies, IDT) or gene fragments (Twist Bioscience). All biosynthetic genes were synthesized with overhangs on both the 5' end (5' – CTTAGTTTTCGACGGATTCTAGAACTAGTGGATCCTATACA – gene – 3') and 3' end (5' – gene – TAACGCGCCACTTCTAAATAAGCGAATTTCTTATGATTTA – 3') for ease of cloning. CRISPRm plasmids expressing *Streptococcus pyogenes* Cas9 (SpCas9) and a single guide RNA (sgRNA) targeting a locus of interest in the yeast genome were constructed by assembly PCR and Gibson assembly of DNA fragments encoding SpCas9 (pCS3410), tRNA promoter and HDV ribozyme (pCS3411), a 20-nt guide RNA sequence (synthesized by the Stanford Protein and Nucleic Acid Facility), and tracrRNA and terminator (pCS3414)(49). For gene insertions, integration fragments containing the gene(s) of interest flanked by a promoter and terminator were constructed by PCR amplification such that they possessed 40 bp overhangs on either end with homology to the yeast genome surrounding the site targeted by the guide RNA sequence. Approximately 300 ng of each integration fragment was co-transformed with 300 ng of the CRISPRm plasmid expressing the sgRNA targeting the desired genomic site. Positive integrants were identified by yeast colony PCR, DNA sequencing (Quintara Biosciences; South San Francisco, CA), and/or functional screening by LC-MS.

### Plasmid construction

Plasmids used in this study (Table S4) were constructed through Gibson assembly. Gibson assembly was performed by amplifying both the gene of interest and the destination plasmid (pCS952(8), pAG414, pAG416, pAG424(50), or pET28) with 40 bp homologous overhangs. PCR amplifications were performed using Q5 DNA polymerase (NEB) and linear DNA fragments were purified using the DNA Clean and Concentrator-5 kit (Zymo Research). Assembled plasmids were propagated in chemically competent *E. coli* (TOP10; Thermo Fisher Scientific) using heat-shock transformation and selection on Luria-Bertani (LB)-agar plates with carbenicillin (100 µg/mL; for pCS952, pAG414, pAG416, and pAG424 derived plasmids) or kanamycin (50 µg/mL; for pET28 derived plasmids). Plasmid DNA was isolated by alkaline lysis from overnight *E. coli* cultures grown at 37 °C and 250 rpm in selective LB media using Econospin columns (Epoch Life Science) according to the manufacturer's protocol.

### Yeast transformations

Yeast strains were chemically transformed using the Frozen-EZ Yeast Transformation II Kit (Zymo Research). Individual colonies were inoculated into YPD media and grown overnight at 30 °C and 250 rpm. Saturated cultures were back-diluted into three new cultures at 1:5, 1:10, and 1:20 dilutions in YPD media and grown for an additional 5–7 hours to reach exponential phase. For each transformation, 1 mL aliquots from each back-diluted culture were pelleted by centrifugation at 500 g for 4 minutes (successively pelleting aliquots from each different dilution into a single pellet in a 1.5 mL microcentrifuge tube) and then washed twice by resuspending the pellet in 1 mL of 50 mM Tris-HCl buffer, pH 8.5. Washed pellets were resuspended in 50 µL of EZ2 solution per transformation and mixed with 100–600 ng of total DNA and 500 µL of the EZ3 solution. The yeast suspensions were incubated at 30 °C with gentle inversion for one hour. For plasmid transformations, the transformed yeast was directly plated onto YNB-DO agar plates. For Cas9-mediated gene integrations, the yeast suspensions in the EZ3 solution were first mixed with 1 mL YPD media, pelleted by centrifugation at 500 g for 4 minutes, and then resuspended in 250 µL of fresh YPD media. The suspensions were incubated at 30 °C with gentle inversion for an additional 90 minutes to allow production of G418 resistance proteins and then spread onto YPD plates containing 400 mg/L G418 sulfate. For all transformations, plates were incubated at 30 °C for 72 hours before being used to inoculate cultures for metabolite assays.

## Supplementary Figures

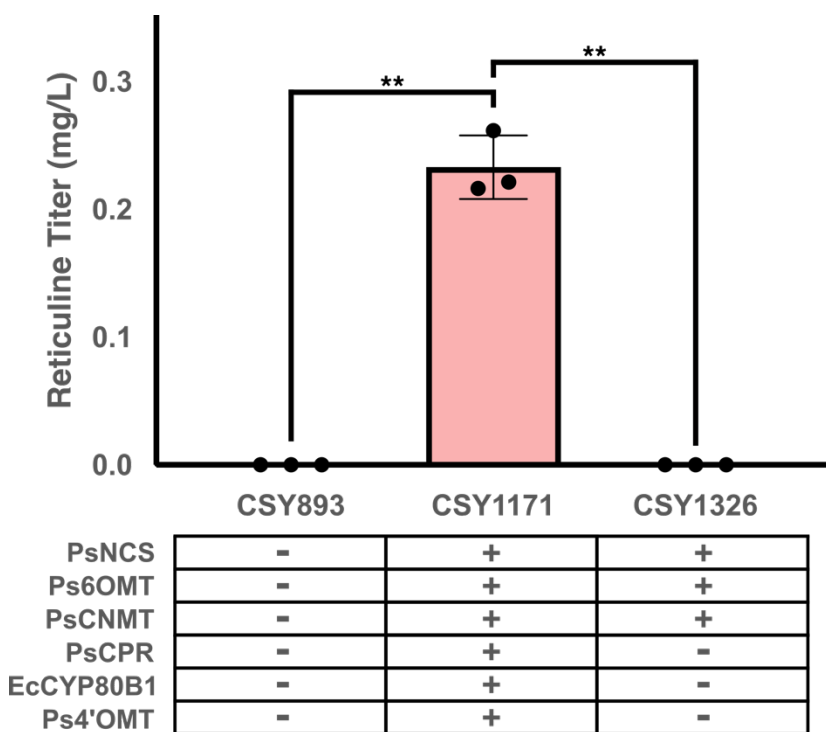

**Fig. S1.** Titer of reticuline produced by strains CSY893, CSY1171, and CSY1326. All strains were cultured for 96 hr at 30 °C in synthetic complete media and the supernatant was subsequently analyzed by LC-MS/MS using the transitions described in Table S5.

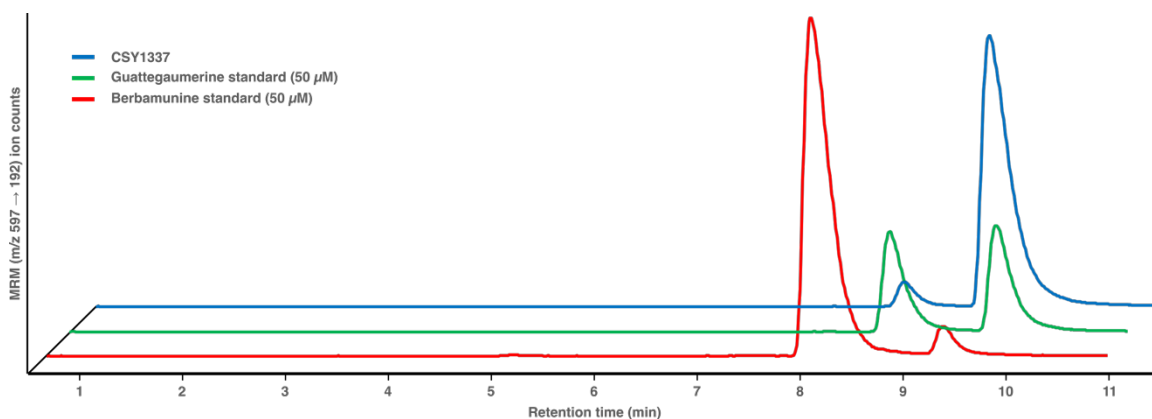

**Fig. S2.** Comparison of standards of berbaminine (red) and guattegaumerine (green) (both shown here at a concentration of 50  $\mu\text{M}$ ; standards were provided by Toni Kutchan) with strain CSY1337 (blue), which produces both berbaminine and guattegaumerine. The guattegaumerine standard contains a nearly equal mixture of both berbaminine and guattegaumerine; concentrations of guattegaumerine were thus determined by first subtracting out the concentration of berbaminine present in the guattegaumerine standard, as determined from the berbaminine standard. Note that the retention times of these peaks would shift slightly over the course of multiple LC-MS/MS runs; whenever such shifts were large enough to result in ambiguous peak assignment, coinjection with berbaminine/guattegaumerine standards was used to verify the identity of the peaks.

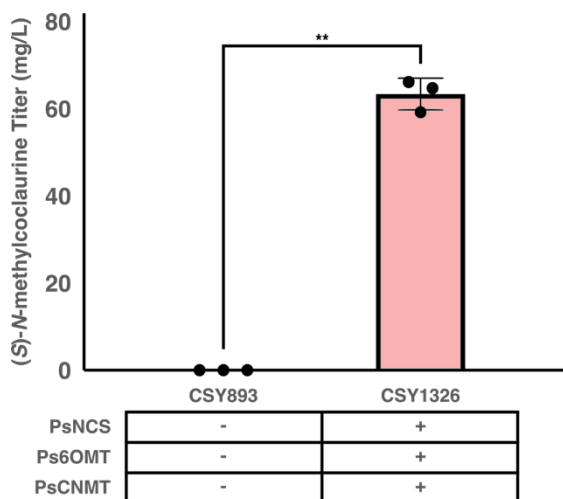

**Fig. S3.** Titer of (S)-N-methylcoclaurine produced by strains CSY893 and CSY1326 under improved media and growth conditions. Both strains were cultured for 96 hr at 25 °C in synthetic complete media supplemented with 2 mM L-DOPA and 10 mM ascorbic acid and the supernatant was subsequently analyzed by LC-MS/MS using the transitions described in Table S5.

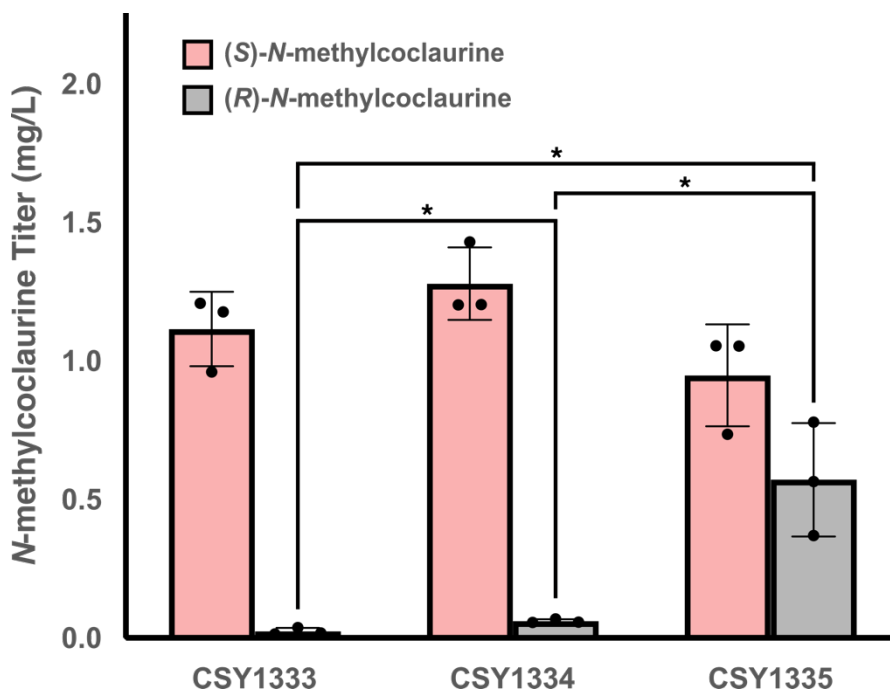

**Fig. S4.** Titters of residual (S)-NMC and (R)-NMC in strains containing either one (CSY1333), two (CSY1334), or three (CSY1335) integrated copies of *PbDRS-DRR 1*. All strains were cultured for 96 hr at 25 °C in synthetic complete media supplemented with 2 mM L-DOPA and 10 mM ascorbic acid and the supernatant was subsequently analyzed by LC-MS/MS using the transitions described in Table S5.

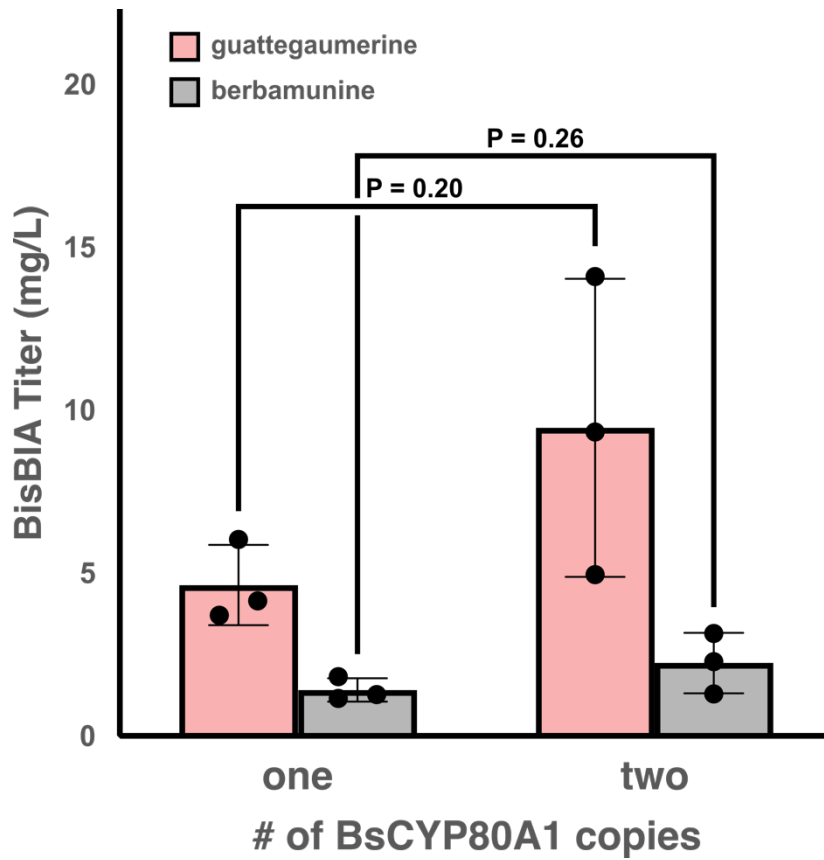

**Fig. S5.** Effect on bisBIA titer of integration of either a single copy (strain CSY1332) or two copies (strain CSY1336) of *BsCYP80A1*. Data shown were collected after 96 hours growth at 25 °C in synthetic complete media supplemented with 2 mM L-DOPA and 10 mM ascorbic acid.



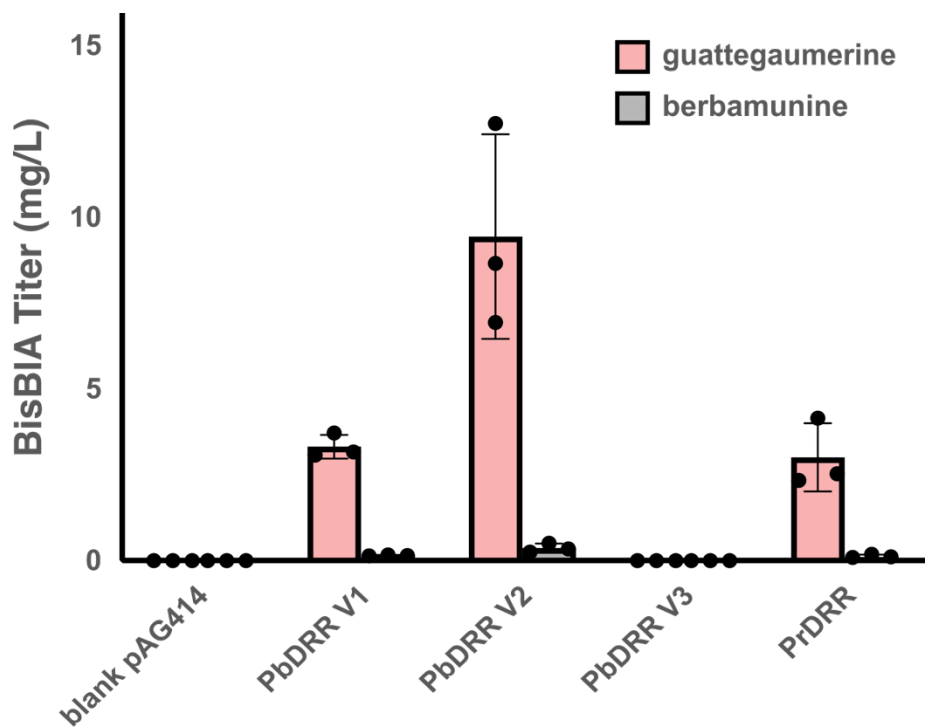

**Fig. S6.** *De novo* production of bisBIAs in yeast strains expressing PrDRS with different DRR domains as individual polypeptides. Strains were cultured in selective media (YNB-Ura-Trp) with 2% dextrose with 2 mM L-DOPA and 10 mM ascorbic acid at 25 °C for 96 h before LC-MS/MS analysis of the growth media using the MRM transitions reported in Table S5.

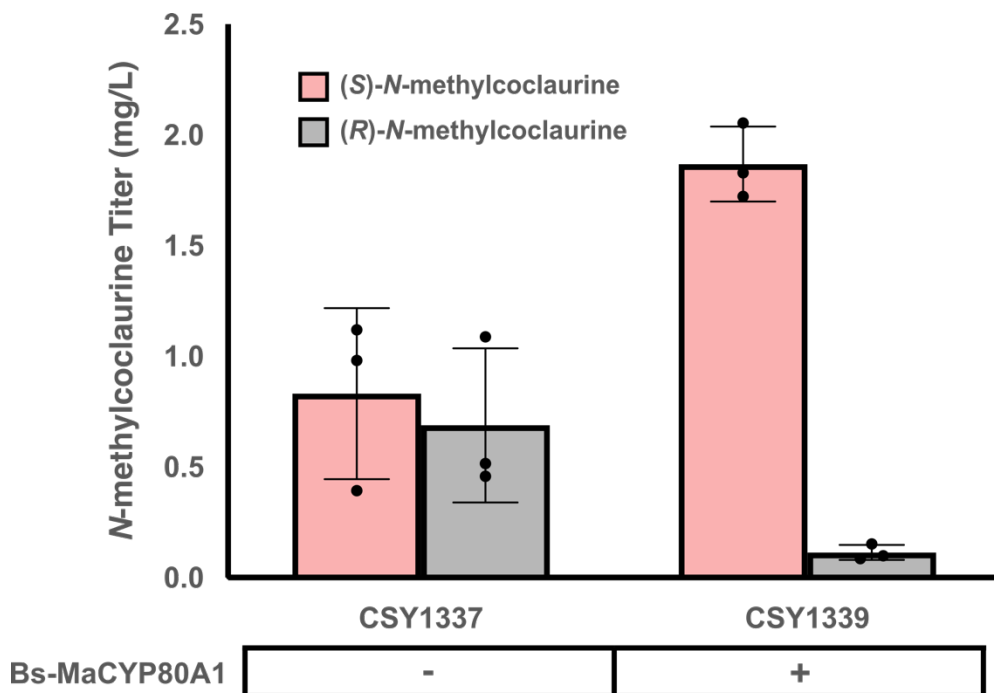

**Fig. S7.** Titters of residual (*S*)-NMC and (*R*)-NMC in our top guattegaumerine producing strain (CSY1337) and our top berbaminine producing strain (CSY1339 expressing Bs-MaCYP80A1 from a high-copy plasmid). Both strains were cultured for 96 hr at 25 °C in the appropriate dropout media supplemented with 2 mM L-DOPA and 10 mM ascorbic acid and the supernatant was subsequently analyzed by LC-MS/MS using the transitions described in Table S5.

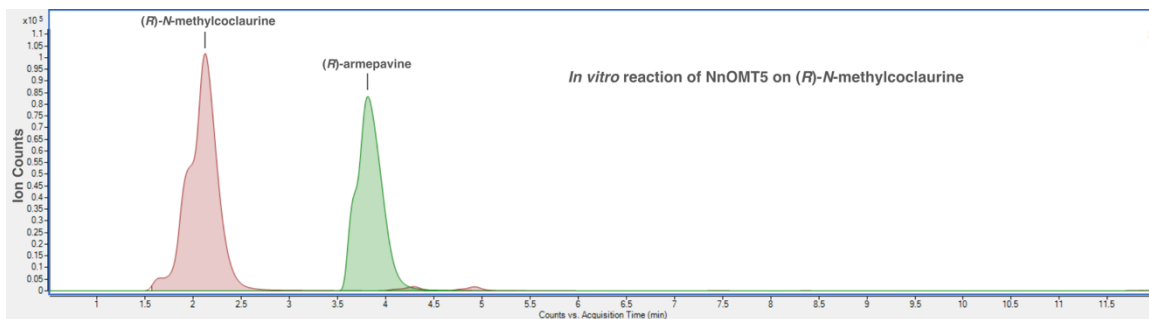

**Fig. S8.** *In vitro* reaction of NnOMT5 on commercial (*R*)-*N*-methylcoclaurine to produce (*R*)-armepavine. Data shown are representative raw LC-MS/MS traces using the transitions shown in Table S5 for *N*-methylcoclaurine and armepavine.



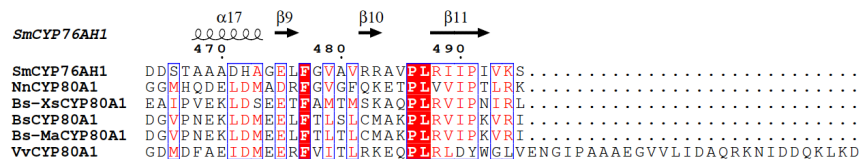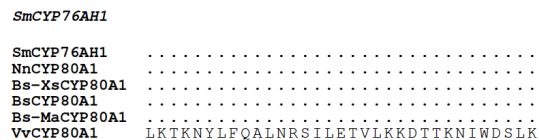

**Fig. S9.** Alignment of protein sequences of different CYP80A1 variants tested *in vivo* in *S. cerevisiae* for bisBIA biosynthesis. Alignment was generated using ClustalOmega (1, 2) and the visualization shown was generated using ESPript (<https://esprpt.ibcp.fr>) (3). As no CYP80A1 crystal structures are currently available, the secondary structural features shown in the alignment are those of the plant P450 with a crystal structure available that is most similar to BsCYP80A1, CYP76AH1 from *Salvia miltiorrhiza* (SmCYP76AH1) (4).

## Supplemental Tables

**Table S1. Yeast strains used in this work.** The prefix “y” here denotes that the gene is codon-optimized for expression in *E. coli*. CSY1171 contains two different isoforms of the *Ps4'OMT* gene – one that is wild-type, called here *Ps4'OMT*, and one that is codon-optimized for the yeast *S. cerevisiae*, called here *yPs4'OMT*.

| Strain ID  | Description                                           | Genotype                                                                                                                                                                                                                                                   |
|------------|-------------------------------------------------------|------------------------------------------------------------------------------------------------------------------------------------------------------------------------------------------------------------------------------------------------------------|
| CSY893(5)  | Control strain                                        | CEN.PK2-1D (MAT $\alpha$ ura3-52; trp1-289; leu2-3, 112; trp1-1; his3 $\Delta$ 1; MAL2-8L; SUC2)                                                                                                                                                           |
| CSY1171(6) | <i>De novo</i> (S)-reticuline strain                  | CSY1060(7); <i>ymr206w-CjNCS<math>\Delta</math>:: yCjNCS-<math>\Delta</math>23; zwf1-CjNCS<math>\Delta</math>:: yCjNCS-<math>\Delta</math>23; ymr206w-RnTyrH<sup>WR</sup>:: yRnTyrH<sup>WR</sup>; ymr206w-RnTyrH<sup>WR</sup>:: yRnTyrH<sup>WR</sup> ‡</i> |
| CSY1326    | <i>De novo</i> (S)- <i>N</i> -methylcoclaurine strain | CSY1171; $\Delta$ <i>PsCPR</i> ; $\Delta$ <i>EcCYP80B1</i> ; $\Delta$ <i>Ps4'OMT</i> *                                                                                                                                                                     |
| CSY1327    | BsCYP80A1 test strain                                 | CSY1326; LEU2:: <i>P<sub>GPD</sub>-BsCYP80A1-T<sub>ADH1</sub></i>                                                                                                                                                                                          |
| CSY1328    | First full pathway strain                             | CSY1327; URA3:: <i>P<sub>TEF1</sub>-PsCPR-T<sub>CYC1</sub></i> , <i>P<sub>HXT7</sub>-PbDRS-DRR 1-T<sub>ADH1</sub></i>                                                                                                                                      |
| CSY1329    | Integrated <i>PsCPR</i>                               | CSY1327; URA3:: <i>P<sub>TEF1</sub>-PsCPR-T<sub>CYC1</sub></i>                                                                                                                                                                                             |
| CSY1330    | Integrated <i>EcCPR</i>                               | CSY1327; URA3:: <i>P<sub>TEF1</sub>-EcCPR-T<sub>CYC1</sub></i>                                                                                                                                                                                             |
| CSY1331    | Integrated <i>AtCPR</i>                               | CSY1327; URA3:: <i>P<sub>TEF1</sub>-AtCPR-T<sub>CYC1</sub></i>                                                                                                                                                                                             |
| CSY1332    | Integrated <i>ScCPR</i>                               | CSY1327; URA3:: <i>P<sub>TEF1</sub>-ScCPR-T<sub>CYC1</sub></i>                                                                                                                                                                                             |
| CSY1333    | First fully integrated <i>de novo</i> bisBIA strain   | CSY1332; TRP3:: <i>P<sub>HXT7</sub>-PbDRS-DRR 1-T<sub>ADH1</sub></i>                                                                                                                                                                                       |
| CSY1334    | Two integrated <i>PbDRS-DRR 1</i> copies              | CSY1333; HIS3:: <i>P<sub>GPD</sub>-PbDRS-DRR 1-T<sub>CYC1</sub></i>                                                                                                                                                                                        |
| CSY1335    | Three integrated <i>PdDRS-DRR 1</i> copies            | CSY1334; <i>ydr514c-yPs4'OMT</i> *:: <i>P<sub>GPD</sub>-PbDRS-DRR 1-T<sub>CYC1</sub></i>                                                                                                                                                                   |
| CSY1336    | Two integrated <i>BsCYP80A1</i> copies                | CSY1332; TRP3:: <i>P<sub>GPD</sub>-BsCYP80A1-T<sub>ADH1</sub></i>                                                                                                                                                                                          |
| CSY1337    | <i>De novo</i> guattegaumerine strain                 | CSY1332; TRP3:: <i>P<sub>GPD</sub>-PrDRS-T<sub>ADH1</sub></i> , <i>P<sub>TEF1</sub>-PbDRR V2-T<sub>CYC1</sub></i> , <i>P<sub>PGK1</sub>-BsCYP80A1-T<sub>PHO5</sub></i>                                                                                     |
| CSY1338    | Second integrated bisBIA module                       | CSY1337; HIS3:: <i>P<sub>HXT7</sub>-BsCYP80A1-T<sub>PGK1</sub></i> , <i>P<sub>TEF1</sub>-EcTyrA<sup>M53I,A354V</sup>-T<sub>CYC1</sub></i> (8), <i>P<sub>GPD</sub>-PrDRS-PbDRR V2 chimera 1-T<sub>ADH1</sub></i>                                            |
| CSY1339    | <i>De novo</i> (R)-NMC strain                         | CSY1335; $\Delta$ <i>BsCYP80A1</i>                                                                                                                                                                                                                         |

**Table S2. Oligonucleotides used in this work.** CSY1171 contains two different isoforms of the *Ps4'OMT* gene – one that is wild-type, called here *Ps4'OMT*, and one that is codon-optimized for the yeast *S. cerevisiae*, called here *yPs4'OMT*. The site targeted by guide RNAs is denoted in bold.

| Oligo ID | Description                                                                                        | Sequence (5' → 3')                                                          |
|----------|----------------------------------------------------------------------------------------------------|-----------------------------------------------------------------------------|
| p73      | Construction of sgRNA-tracrRNA cassette                                                            | ATGTGTTATGTCGACTTAATGTGCTTCAGTATTACATTTTT                                   |
| p74      | Construction of sgRNA-tracrRNA cassette                                                            | CTAGACCTATATCGTAGTTAATCCACTAGACAGAAGTTTG                                    |
| pTV5     | gRNA for construction of CSY1326 strain (excision of PsCPR, EcCYP80B1, and Ps4'OMT from CSY1171)   | GTGGCGAATGGGACTTT <b>GATTGAACTCGTAAAAGCAAG</b> TTTTAGAG<br>CTAGAAATAGCAAGT  |
| pTV6     | gRNA for construction of CSY1326 strain (excision of PsCPR, EcCYP80B1, and Ps4'OMT from CSY1171)   | GTGGCGAATGGGACTTT <b>AGTGAATGATCTGCCGGTAGG</b> TTTTAGAG<br>CTAGAAATAGCAAGT  |
| pTV136   | gRNA for cutting at <i>BsCY80A1</i>                                                                | GTGGCGAATGGGACTTT <b>TATACACGGTATGTTGATGACG</b> TTTTAGAGC<br>TAGAAATAGCAAGT |
| pTV228   | gRNA for cutting at <i>yPs4'OMT</i>                                                                | GTGGCGAATGGGACTTT <b>GATATCATCAAGAACAACGAG</b> TTTTAGAG<br>CTAGAAATAGCAAGT  |
| pTV229   | gRNA for cutting at <i>yPs4'OMT</i>                                                                | GTGGCGAATGGGACTTT <b>GAACAAGAACTTGTAACGGG</b> TTTTAGAG<br>CTAGAAATAGCAAGT   |
| pTV356   | gRNA for cutting at <i>ScPDC1</i>                                                                  | GTGGCGAATGGGACTTT <b>CAATTCACCGACACCGAAGG</b> TTTTAGAG<br>CTAGAAATAGCAAGT   |
| pTV11    | Repair gap in construction of CSY1326 strain after cutting with pCS3695, replacing with Leu marker | CAAAAATGAAAAAAGGAAGAGTGAATGATCTGCCGGCTTTAATTT<br>GCGGCCAAG                  |
| pTV12    | Repair gap in construction of CSY1326 strain after cutting with pCS3695, replacing with Leu marker | TACCTACAAAACCTTCTAGCTAGATTGAACTCGTAAAAGTTACGAATTC<br>GAGCTCGGTAC            |
| pTV147   | Repair gap in <i>BsCYP80A1</i> after cutting with pCS4718, inserting His tag from pET28            | GACAGGGAAATAACTAGCTACATCAAAATCACCTCCGGTCTCAGTGG<br>TGGTGGTGGTG              |
| pTV148   | Repair gap in <i>BsCYP80A1</i> after cutting with pCS4718, inserting His tag from pET28            | TGATGAGGTTGGAATGGACAAATTGATACACGGTATGTTGATTAATAT<br>GTTTGAAGGAGTACCAAATGCA  |
| pTV230   | Repair gap in <i>yPs4'OMT</i> after cutting with pCS4719, inserting <i>ScCPR</i>                   | CAATTTAGCAGCCAATTGAGCCAAGGTAATAGCACCATCGCTGAGAG<br>TGCACCATAT               |
| pTV231   | Repair gap in <i>yPs4'OMT</i> after cutting with pCS4719, inserting <i>ScCPR</i>                   | TGCGCTGTTGAAATTGGTATTGCCGATATCATCAAGAACAACAAATTA<br>AAGCCTTCGAGCG           |

|                    |                                                                                                              |                                                                                |
|--------------------|--------------------------------------------------------------------------------------------------------------|--------------------------------------------------------------------------------|
| pTV232             | Repair gap in <i>yPs4'OMT</i> after cutting with pCS4720, inserting <i>ScCPR</i>                             | TAGATACTTGGTCCACTTGAACATTATCGAACAAGAACTTGTAAGT<br>AGAGTGCACCATATGCATA          |
| pTV233             | Repair gap in <i>yPs4'OMT</i> after cutting with pCS4720, inserting <i>ScCPR</i>                             | ACCAACTGGTTTCAAAGAGTAAACCTTTTCGACACCACCGCAAATTAA<br>AGCCTTCGA                  |
| pTV246             | Repair gap in <i>yPs4'OMT</i> after cutting with pCS4720, inserting <i>yCjNCS-Δ23</i>                        | AATCATAAATCATAAGAAATTCGCTTATTTAGAAGTGGCGCTCATTCA<br>GATGACTTATG                |
| pTV247             | Repair gap in <i>yPs4'OMT</i> after cutting with pCS4720, inserting <i>yCjNCS-Δ23</i>                        | TAGTTTCGACGGATTCTAGAAGTGGATCCTATACAATGAACGGTA<br>GACCTTTGTT                    |
| pTV361             | Repair gap in <i>ScPDC1</i> after cutting with pCS4721                                                       | GCTGATGGTTACGCTCGTATCAAGGGTATGTCTTGTATCATCACCAC<br>CTACAAAAGCTGGAGCTCTT        |
| pTV362             | Repair gap in <i>ScPDC1</i> after cutting with pCS4721                                                       | CCGGCAATACCGTTCAAAGCAGACAATTCACCGACACCGATGATCTG<br>CCGGTAGAG                   |
| Module_1<br>-1_fwd | Construction of strain CSY1337; <i>P<sub>GPD</sub>-PrDRS-T<sub>ADH1</sub></i> portion                        | TTAATCGGCAAAAAAAGAAAAGCTCCGGATCAAGATTGTAGAGCTCTT<br>CGAGTTTATCAT               |
| Module_1<br>-1_rev | Construction of strain CSY1337; <i>P<sub>GPD</sub>-PrDRS-T<sub>ADH1</sub></i> portion                        | CGCTCGAAGGCTTTAATTTGTGATCTGCCGGTAGAGGTGT                                       |
| Module_1<br>-2_fwd | Construction of strain CSY1337; <i>P<sub>TEF</sub>-PbDRR V2-T<sub>CYC1</sub></i> portion                     | CAAATTAAGCCTTCGAGCGTCCCAAAACCTT                                                |
| Module_1<br>-2_rev | Construction of strain CSY1337; <i>P<sub>TEF</sub>-PbDRR V2-T<sub>CYC1</sub></i> portion                     | ATATGCATAGCTTCAAATGTTTCTACTCCTTTTTTACTC                                        |
| Module_1<br>-3_fwd | Construction of strain CSY1337; <i>P<sub>PGK1</sub>-BsCYP80A1-T<sub>PHO5</sub></i> portion                   | CTGGAAGAGTAAAAAAGGAGTAGAAACATTTTGAAGCTATGCATATAG<br>GCATTTGCAAGAATTACT         |
| Module_1<br>-3_rev | Construction of strain CSY1337; <i>P<sub>PGK1</sub>-BsCYP80A1-T<sub>PHO5</sub></i> portion                   | AGTAGTGGAAAGATATTCTTTATTGAAAATAGCTTGTACCTTACGTT<br>CACTCTTCTTTTTTTTCATTTTTG    |
| Module_2<br>-1_fwd | Construction of strain CSY1339; <i>P<sub>HXT7</sub>-BsCYP80A1-T<sub>PGK</sub></i> portion                    | ATTTTTTGTCAAATATCGTATCTATAGAGATAATCTCTATCAACTCAA<br>ACTCGTAGGAACAATTTCCGGGCCCC |
| Module_2<br>-1_rev | Construction of strain CSY1339; <i>P<sub>HXT7</sub>-BsCYP80A1-T<sub>PGK</sub></i> portion                    | GGGACGCTCGAAGGCTTTAATTTGAACGAACGCAGAATTTTCGAGTT<br>ATTAAACT                    |
| Module_2<br>-2_fwd | Construction of strain CSY1339; <i>P<sub>TEF1</sub>-EcTyrA<sup>M53I,A354V</sup>-T<sub>CYC1</sub></i> portion | AGTTTAATAACTCGAAAATTCTGCGTTCGTTCAAATTAAGCCTTCGA<br>GCGTCCC                     |
| Module_2<br>-2_rev | Construction of strain CSY1339; <i>P<sub>TEF1</sub>-EcTyrA<sup>M53I,A354V</sup>-T<sub>CYC1</sub></i> portion | CGAAGAGCTCCAGCTTTTGTATAGCTTCAAATGTTTCTACTCCTTT<br>TTTAC                        |
| Module_2<br>-3_fwd | Construction of strain CSY1339; <i>P<sub>GPD</sub>-PrDRS-PbDRR V2 chimera 1-T<sub>ADH</sub></i> portion      | GTAAAAAAGGAGTAGAAACATTTTGAAGCTATGACAAAAGCTGGAGC<br>TCTTCGAGTTTATCATTATCAATACT  |
| Module_2<br>-3_rev | Construction of strain CSY1339; <i>P<sub>GPD</sub>-PrDRS-PbDRR V2 chimera 1-T<sub>ADH</sub></i> portion      | GATTGTACGGGGAATGGAAAATGTACATATAATATCCAGTATCATGAT<br>CTGCCGGTAGAGGTGTGGTC       |





|         |                                                                 |                                                                      |
|---------|-----------------------------------------------------------------|----------------------------------------------------------------------|
| pJP-297 | Amplification of <i>yCt7OMT</i> for Gibson assembly into pET-28 | TCATCATCACAGCAGCGGCCTGGTGCCGCGCGGCAGCCATATGGAG<br>ACGATTCTTCAAGGTCAA |
| pJP-298 | Amplification of <i>yCt7OMT</i> for Gibson assembly into pET-28 | TCATCATCACAGCAGCGGCCTGGTGCCGCGCGGCAGCCATATGGAG<br>ACGATTCTTCAAGGTCAA |

---

**Table S3. Genes used in this work.**

| Gene ID                     | Description                                       | Source organism                 | Accession ID |
|-----------------------------|---------------------------------------------------|---------------------------------|--------------|
| <i>ARO4<sup>Q166K</sup></i> | DAHP synthase                                     | <i>Saccharomyces cerevisiae</i> | AJQ16674.1   |
| <i>ARO7<sup>T226I</sup></i> | Chorismate mutase                                 | <i>Saccharomyces cerevisiae</i> | NP_015385    |
| <i>ARO10</i>                | Phenylpyruvate decarboxylase                      | <i>Saccharomyces cerevisiae</i> | NP_010668    |
| <i>TKL1</i>                 | Transketolase                                     | <i>Saccharomyces cerevisiae</i> | NP_015399    |
| <i>RnSpr</i>                | Sepiapterin reductase                             | <i>Rattus norvegicus</i>        | AAA42130     |
| <i>RnPts</i>                | 6-pyruvoyltetrahydropterin synthase               | <i>Rattus norvegicus</i>        | AAH59140     |
| <i>RnQdpr</i>               | Dihydropteridine reductase                        | <i>Rattus norvegicus</i>        | P11348       |
| <i>RnPcbd1</i>              | Pterin-4-alpha-carbinolamine dehydratase          | <i>Rattus norvegicus</i>        | NP_001007602 |
| <i>RnTyrH<sup>WT</sup></i>  | Tyrosinase                                        | <i>Rattus norvegicus</i>        | NP_036872    |
| <i>CjNCS</i>                | Norcoclaurine synthase                            | <i>Coptis japonica</i>          | BAF45338     |
| <i>Ps6OMT</i>               | Norcoclaurine 6-O-methyltransferase               | <i>Papaver somniferum</i>       | AY268894.1   |
| <i>PsCNMT</i>               | Coclaurine N-methyltransferase                    | <i>Papaver somniferum</i>       | AY217336.1   |
| <i>Ps4'OMT</i>              | 6-Methyl-(S)-laudanosoline 4'-O-methyltransferase | <i>Papaver somniferum</i>       | MF038041.1   |
| <i>PsCPR</i>                | Cytochrome P450 reductase                         | <i>Papaver somniferum</i>       | AAC05021     |
| <i>EcCPR</i>                | Cytochrome P450 reductase                         | <i>Eschscholzia californica</i> | U67186.1     |
| <i>AtCPR</i>                | Cytochrome P450 reductase                         | <i>Arabidopsis thaliana</i>     | X66016.1     |
| <i>ScCPR</i>                | Cytochrome P450 reductase                         | <i>Saccharomyces cerevisiae</i> | D13788.1     |
| <i>PbDRS-DRR 1</i>          | Reticuline epimerase                              | <i>Papaver bracteatum</i>       | No ID        |
| <i>PbDRS-DRR 2</i>          | Reticuline epimerase                              | <i>Papaver bracteatum</i>       | No ID        |

|                  |                                                            |                                   |                |
|------------------|------------------------------------------------------------|-----------------------------------|----------------|
| <i>PsDRS-DRR</i> | Reticuline epimerase                                       | <i>Papaver somniferum</i>         | KP985715.1     |
| <i>PrDRS</i>     | 1,2-dehydroreticuline synthase                             | <i>Papaver rhoeas</i>             | KP985716.1     |
| <i>PrDRR</i>     | 1,2-dehydroreticuline reductase                            | <i>Papaver rhoeas</i>             | KP985723.1     |
| <i>PbREPI</i>    | Reticuline epimerase                                       | <i>Papaver bracteatum</i>         | KP985719.1     |
| <i>BsCYP80A1</i> | Berbamunine synthase                                       | <i>Berberis stolonifera</i>       | U09610.1       |
| <i>NnCYP80A1</i> | Berbamunine synthase                                       | <i>Nelumbo nucifera</i>           | XM_010255688.2 |
| <i>VvCYP80A1</i> | Berbamunine synthase                                       | <i>Vitis vinifera</i>             | RVW28439.1     |
| <i>MaCYP80A1</i> | Berbamunine synthase                                       | <i>Mahonia aquifolium</i>         | No ID          |
| <i>XsCYP80A1</i> | Berbamunine synthase                                       | <i>Xanthorrhiza simplicissima</i> | No ID          |
| <i>SiCNMT2</i>   | Coclaurine <i>N</i> -methyltransferase                     | <i>Stephania intermedia</i>       | MK749413       |
| <i>NnOMT5</i>    | ( <i>RS</i> )-norcoclaurine 6- <i>O</i> -methyltransferase | <i>Nelumbo nucifera</i>           | XM_010277761   |
| <i>Ct7OMT</i>    | Norcoclaurine 7- <i>O</i> -methyltransferase               | <i>Coptis teeta</i>               | MH165877.1     |

**Table S4. Plasmids used in this work.** CSY1171 contains two different isoforms of the *Ps4'OMT* gene – one that is wild-type, called here *Ps4'OMT*, and one that is codon-optimized for the yeast *S. cerevisiae*, called here *yPs4'OMT*.

| Plasmid | Description                                                                                                                                                                                                                                                         | Origin  | Marker | Source    |
|---------|---------------------------------------------------------------------------------------------------------------------------------------------------------------------------------------------------------------------------------------------------------------------|---------|--------|-----------|
| pCS952  | High-copy <i>S. cerevisiae</i> expression vector, P <sub>TEF1</sub> - <i>TfS9OMT</i> -T <sub>CYC1</sub>                                                                                                                                                             | 2μ      | URA3   | (9)       |
| pAG414  | Empty yeast expression vector; P <sub>TDH3</sub> -attR1- <i>CmR</i> -ccdB-attR2-T <sub>CYC1</sub>                                                                                                                                                                   | CEN/ARS | TRP1   | (10)      |
| pAG416  | Empty yeast expression vector; P <sub>TDH3</sub> -attR1- <i>CmR</i> -ccdB-attR2-T <sub>CYC1</sub>                                                                                                                                                                   | CEN/ARS | URA3   | (10)      |
| pAG424  | Empty yeast expression vector; P <sub>TDH3</sub> -attR1- <i>CmR</i> -ccdB-attR2-T <sub>CYC1</sub>                                                                                                                                                                   | 2μ      | TRP1   | (10)      |
| pET-28  | <i>E. coli</i> expression vector                                                                                                                                                                                                                                    | pBR322  | kan    | Novagen   |
| pCS3300 | Low-copy expression in <i>S. cerevisiae</i> of PbDRS-DRR 1; pAG416; P <sub>HXT7</sub> - <i>PbDRS-DRR 1</i> -T <sub>CYC1</sub>                                                                                                                                       | CEN/ARS | URA3   | (11)      |
| pCS3301 | Low-copy expression in <i>S. cerevisiae</i> of PbDRS-DRR 1; pAG416; P <sub>TDH3</sub> - <i>PbDRS-DRR 1</i> -T <sub>CYC1</sub>                                                                                                                                       | CEN/ARS | URA3   | (11)      |
| pCS3302 | Low-copy expression in <i>S. cerevisiae</i> of PsDRS-DRR; pAG416; P <sub>HXT7</sub> - <i>PsDRS-DRR</i> -T <sub>CYC1</sub>                                                                                                                                           | CEN/ARS | URA3   | (11)      |
| pCS3304 | Low-copy expression in <i>S. cerevisiae</i> of PbDRS-DRR 2; pAG416; P <sub>HXT7</sub> - <i>PbDRS-DRR 2</i> -T <sub>CYC1</sub>                                                                                                                                       | CEN/ARS | URA3   | (11)      |
| pCS3410 | Cas9 CRISPR vector for sequence-specific yeast genome integration; pUC-P <sub>RNR2</sub> - <i>SpCas9-SV40NLS-8xHis</i> -T <sub>CYC1</sub>                                                                                                                           | 2μ      | KanMX  | (12)      |
| pCS3411 | sgRNA promoter + HDV ribozyme; pUC; P <sub>IRNA</sub> - <i>Phe-HDV</i>                                                                                                                                                                                              | --      | --     | (12)      |
| pCS3414 | sgRNA tracrRNA + terminator; pUC; <i>tracrRNA</i> -T <sub>SNR52</sub>                                                                                                                                                                                               | --      | --     | (12)      |
| pCS3695 | Cas9 CRISPR vector for double cutting to excise PsCPR, EcCYP80B1, and Ps4'OMT from CSY1171 ( <i>de novo</i> ( <i>S</i> )-reticuline strain); pCS3410; P <sub>IRNA</sub> - <i>Phe-HDV</i> -sgRNA <sub>pTV5</sub> -sgRNA <sub>pTV6</sub> -tracrRNA-T <sub>SNR52</sub> | 2μ      | KanMX  | This work |
| pCS3700 | Cas9 CRISPR vector for integration at <i>ura3</i> locus; pCS3410; P <sub>IRNA</sub> - <i>Phe-HDV</i> -sgRNA <sub>ura3</sub> -tracrRNA-T <sub>SNR52</sub>                                                                                                            | 2μ      | KanMX  | (13)      |
| pCS3701 | Cas9 CRISPR vector for integration at <i>leu2</i> locus; pCS3410; P <sub>IRNA</sub> - <i>Phe-HDV</i> -sgRNA <sub>leu2</sub> -tracrRNA-T <sub>SNR52</sub>                                                                                                            | 2μ      | KanMX  | (13)      |
| pCS3702 | Cas9 CRISPR vector for integration at <i>trp3</i> locus; pCS3410; P <sub>IRNA</sub> - <i>Phe-HDV</i> -sgRNA <sub>trp3</sub> -tracrRNA-T <sub>SNR52</sub>                                                                                                            | 2μ      | KanMX  | (13)      |

|         |                                                                                                                                                                              |         |       |           |
|---------|------------------------------------------------------------------------------------------------------------------------------------------------------------------------------|---------|-------|-----------|
| pCS3703 | Cas9 CRISPR vector for integration at <i>his2</i> locus; pCS3410; P <sub>IRNA-Phe-HDV-sgRNA<sub>his2</sub>-tracrRNA-T<sub>SNR52</sub></sub>                                  | 2μ      | KanMX | (13)      |
| pCS4717 | Cas9 CRISPR vector for integration at <i>PcCNMT</i> gene to disrupt production; pCS3410; P <sub>IRNA-Phe-HDV-sgRNA<sub>PcCNMT</sub>-tracrRNA-T<sub>SNR52</sub></sub>         | 2μ      | KanMX | This work |
| pCS4718 | Cas9 CRISPR vector for integration at <i>PcCYP80A1</i> gene to disrupt production; pCS3410; P <sub>IRNA-Phe-HDV-sgRNA<sub>PcCYP80A1</sub>-tracrRNA-T<sub>SNR52</sub></sub>   | 2μ      | KanMX | This work |
| pCS4719 | Cas9 CRISPR vector for integration at <i>yPs4'OMT</i> gene to disrupt production; pCS3410; P <sub>IRNA-Phe-HDV-sgRNA<sub>Ps4'OMT g228</sub>-tracrRNA-T<sub>SNR52</sub></sub> | 2μ      | KanMX | This work |
| pCS4720 | Cas9 CRISPR vector for integration at <i>yPs4'OMT</i> gene to disrupt production; pCS3410; P <sub>IRNA-Phe-HDV-sgRNA<sub>Ps4'OMT g229</sub>-tracrRNA-T<sub>SNR52</sub></sub> | 2μ      | KanMX | This work |
| pCS4721 | Cas9 CRISPR vector for integration at <i>ScPDC1</i> gene to disrupt production; pCS3410; P <sub>IRNA-Phe-HDV-sgRNA<sub>ScPDC1</sub>-tracrRNA-T<sub>SNR52</sub></sub>         | 2μ      | KanMX | This work |
| pCS4722 | Low-copy expression in <i>S. cerevisiae</i> of PsCPR; pAG414; P <sub>TEF1-PsCPR-T<sub>CYC1</sub></sub>                                                                       | CEN/ARS | TRP1  | This work |
| pCS4723 | Empty pAG416 vector for control                                                                                                                                              | CEN/ARS | URA3  | This work |
| pCS4724 | Empty pAG414 vector for control                                                                                                                                              | CEN/ARS | TRP1  | This work |
| pCS4725 | Low-copy expression in <i>S. cerevisiae</i> of PbREPI; pAG416; P <sub>TDH3-PbREPI-T<sub>ADH1</sub></sub>                                                                     | CEN/ARS | URA3  | This work |
| pCS4726 | Low-copy expression in <i>S. cerevisiae</i> of PbDRS V1; pAG416; P <sub>TDH3-PbDRS V1-T<sub>ADH1</sub></sub>                                                                 | CEN/ARS | URA3  | This work |
| pCS4727 | Low-copy expression in <i>S. cerevisiae</i> of PbDRS V2; pAG416; P <sub>TDH3-PbDRS V2-T<sub>ADH1</sub></sub>                                                                 | CEN/ARS | URA3  | This work |
| pCS4728 | Low-copy expression in <i>S. cerevisiae</i> of PbDRS V3; pAG416; P <sub>TDH3-PbDRS V3-T<sub>ADH1</sub></sub>                                                                 | CEN/ARS | URA3  | This work |
| pCS4729 | Low-copy expression in <i>S. cerevisiae</i> of PrDRS; pAG416; P <sub>TDH3-PrDRS-T<sub>ADH1</sub></sub>                                                                       | CEN/ARS | URA3  | This work |
| pCS4730 | Low-copy expression in <i>S. cerevisiae</i> of PbREPI DRS; pAG416; P <sub>TDH3-PbREPI DRS-T<sub>ADH1</sub></sub>                                                             | CEN/ARS | URA3  | This work |
| pCS4731 | Low-copy expression in <i>S. cerevisiae</i> of PbDRR V1; pAG414; P <sub>TEF1-PbDRR V1-T<sub>CYC1</sub></sub>                                                                 | CEN/ARS | TRP1  | This work |
| pCS4732 | Low-copy expression in <i>S. cerevisiae</i> of PbDRR V2; pAG414; P <sub>TEF1-PbDRR V2-T<sub>CYC1</sub></sub>                                                                 | CEN/ARS | TRP1  | This work |
| pCS4733 | Low-copy expression in <i>S. cerevisiae</i> of PbDRR V3; pAG414; P <sub>TEF1-PbDRR V3-T<sub>CYC1</sub></sub>                                                                 | CEN/ARS | TRP1  | This work |

|         |                                                                                                                                                |         |      |           |
|---------|------------------------------------------------------------------------------------------------------------------------------------------------|---------|------|-----------|
| pCS4734 | Low-copy expression in <i>S. cerevisiae</i> of PrDRR; pAG414; P <sub>TEF1</sub> -PrDRR-T <sub>CYC1</sub>                                       | CEN/ARS | TRP1 | This work |
| pCS4735 | Low-copy expression in <i>S. cerevisiae</i> of PrDRS-PbDRR V2 chimera 1; pAG416; P <sub>TDH3</sub> -PrDRS-PbDRR V2 chimera 1-T <sub>ADH1</sub> | CEN/ARS | URA3 | This work |
| pCS4736 | Low-copy expression in <i>S. cerevisiae</i> of PrDRS-PbDRR V2 chimera 2; pAG416; P <sub>TDH3</sub> -PrDRS-PbDRR V2 chimera 2-T <sub>ADH1</sub> | CEN/ARS | URA3 | This work |
| pCS4737 | Low-copy expression in <i>S. cerevisiae</i> of PrDRS-PbDRR V2 chimera 3; pAG416; P <sub>TDH3</sub> -PrDRS-PbDRR V2 chimera 3-T <sub>ADH1</sub> | CEN/ARS | URA3 | This work |
| pCS4738 | High-copy expression in <i>S. cerevisiae</i> of BsCYP80A1; pAG424; P <sub>TDH3</sub> -BsCYP80A1-T <sub>CYC1</sub>                              | 2μ      | TRP1 | This work |
| pCS4739 | High-copy expression in <i>S. cerevisiae</i> of NnCYP80A1; pAG424; P <sub>TDH3</sub> -NnCYP80A1-T <sub>CYC1</sub>                              | 2μ      | TRP1 | This work |
| pCS4740 | High-copy expression in <i>S. cerevisiae</i> of VvCYP80A1; pAG424; P <sub>TDH3</sub> -VvCYP80A1-T <sub>CYC1</sub>                              | 2μ      | TRP1 | This work |
| pCS4741 | High-copy expression in <i>S. cerevisiae</i> of Bs-MaCYP80A1; pAG424; P <sub>TDH3</sub> -Bs-MaCYP80A1-T <sub>CYC1</sub>                        | 2μ      | TRP1 | This work |
| pCS4742 | High-copy expression in <i>S. cerevisiae</i> of Bs-XsCYP80A1; pAG424; P <sub>TDH3</sub> -Bs-XsCYP80A1-T <sub>CYC1</sub>                        | 2μ      | TRP1 | This work |
| pCS4743 | High-copy expression in <i>S. cerevisiae</i> of ySiCNMT2; pCS952; P <sub>TEF1</sub> -ySiCNMT2-T <sub>CYC1</sub>                                | 2μ      | URA3 | This work |
| pCS4744 | High-copy expression in <i>S. cerevisiae</i> of yNnOMT5; pCS952; P <sub>TEF1</sub> -yNnOMT5-T <sub>CYC1</sub>                                  | 2μ      | URA3 | This work |
| pCS4745 | High-copy expression in <i>S. cerevisiae</i> of yCt7OMT; pCS952; P <sub>TEF1</sub> -yCt7OMT-T <sub>CYC1</sub>                                  | 2μ      | URA3 | This work |
| pCS4746 | Low-copy expression in <i>E. coli</i> of yNnOMT5; pET-28                                                                                       | pBR322  | kan  | This work |
| pCS4747 | Low-copy expression in <i>E. coli</i> of yCt7OMT; pET-28                                                                                       | pBR322  | kan  | This work |

**Table S5. LC-MS/MS multiple reaction monitoring (MRM) transitions and parameters used in this work.**

| Compound                    | Quantifier MRM transition (m/z <sup>+</sup> ) | Fragmentor Voltage | Collision Energy | Reference |
|-----------------------------|-----------------------------------------------|--------------------|------------------|-----------|
| Norcoclaurine               | 272.2 → 107                                   | 170                | 28               | (14)      |
| Berbamunine/guattegaumerine | 597 → 192                                     | 100                | 37               | This work |
| N-methylcoclaurine          | 300 → 107                                     | 100                | 37               | (15)      |
| Armepavine                  | 314 → 107                                     | 100                | 35               | (16)      |
| Magnocurarine               | 315 → 107                                     | 122                | 30               | This work |
| Dauricine                   | 625 → 206                                     | 150                | 46               | This work |

| Compound                    | Qualifier MRM transition (m/z <sup>+</sup> ) | Fragmentor Voltage | Collision Energy | Reference |
|-----------------------------|----------------------------------------------|--------------------|------------------|-----------|
| Norcoclaurine               | 272.2 → 161                                  | 170                | 15               | (14)      |
| Berbamunine/guattegaumerine | 597 → 475                                    | 110                | 25               | This work |
| N-methylcoclaurine          | 300 → 175                                    | 100                | 25               | (17)      |
| Armepavine                  | 314 → 283                                    | 122                | 18               | This work |
| Magnocurarine               | 315 → 58                                     | 122                | 34               | This work |
| Dauricine                   | 625 → 190                                    | 150                | 98               | This work |



**Table S6. Exact *p*-values from Student's two-tailed t-tests in Figures 1-4.**

| Figure | Test                                                                                                                                                    | <i>p</i> -value       |
|--------|---------------------------------------------------------------------------------------------------------------------------------------------------------|-----------------------|
| 1b     | ( <i>S</i> )- <i>N</i> -methylcoclaurine production with PsNCS/Ps6OMT/PsCNMT vs. without PsNCS/Ps6OMT/PsCNMT                                            | $2.02 \times 10^{-3}$ |
| 1c     | Guattegaumerine production with BsCYP80A1 & fed ( <i>R</i> )-NMC vs. with fed ( <i>R</i> )-NMC but without BsCYP80A1                                    | 0.0322                |
| 1c     | Guattegaumerine production with BsCYP80A1 & fed ( <i>R</i> )-NMC vs. with BsCYP80A1 but without fed ( <i>R</i> )-NMC                                    | 0.0321                |
| 2a     | BisBIA production with PsCPR vs. with no CPR                                                                                                            | 0.0177                |
| 2a     | BisBIA production with ScCPR vs. with no CPR                                                                                                            | 0.0388                |
| 4b     | Berbamunine production with Bs-MaCYP80A1 vs. without Bs-MaCYP80A1                                                                                       | $4.67 \times 10^{-3}$ |
| 4c     | Magnocurarine production with SiCNMT2 vs. without SiCNMT2                                                                                               | 0.0261                |
| 4d     | ( <i>RS</i> )-armepavine production with NnOMT5 vs. without NnOMT5                                                                                      | $6.68 \times 10^{-3}$ |
| 4d     | ( <i>RS</i> )-armepavine production with Ct7OMT vs. without Ct7OMT                                                                                      | 0.0103                |
| S1     | <i>De novo</i> reticuline production, strain CSY893 vs. CSY1171                                                                                         | $3.77 \times 10^{-3}$ |
| S1     | <i>De novo</i> reticuline production, strain CSY1326 vs. CSY1171                                                                                        | $3.77 \times 10^{-3}$ |
| S3     | ( <i>S</i> )- <i>N</i> -methylcoclaurine production with PsNCS/Ps6OMT/PsCNMT vs. without PsNCS/Ps6OMT/PsCNMT, with L-DOPA/ascorbic acid supplementation | $2.78 \times 10^{-3}$ |
| S4     | Residual ( <i>R</i> )-NMC titer, CSY1333 vs. CSY1334                                                                                                    | 0.0180                |
| S4     | Residual ( <i>R</i> )-NMC titer, CSY1333 vs. CSY1335                                                                                                    | 0.0431                |
| S4     | Residual ( <i>R</i> )-NMC titer, CSY1334 vs. CSY1335                                                                                                    | 0.0496                |
| S5     | Effect of a second integrated <i>BsCYP80A1</i> copy, guattegaumerine titer                                                                              | 0.203                 |
| S5     | Effect of a second integrated <i>BsCYP80A1</i> copy, berbamunine titer                                                                                  | 0.260                 |

**Table S7. Sequences of genes used in this work.**

| Gene ID            | Sequence                                                                                                                                                                                                                                                                                                                                                                                                                                                                                                                                                                                                                                                                                                                                                                                                                                                                                                                                                                                                                                                                                                                                                                                                                                                                                                                                                                                                                                                                                                                                                                                                                                                                                                                                                                                                                                                                                                                                                                                                                                                                                                                                                                                                                                                                                                                                                                                                                                                                                                                                                                                                                                                                                                                                                                                                     |
|--------------------|--------------------------------------------------------------------------------------------------------------------------------------------------------------------------------------------------------------------------------------------------------------------------------------------------------------------------------------------------------------------------------------------------------------------------------------------------------------------------------------------------------------------------------------------------------------------------------------------------------------------------------------------------------------------------------------------------------------------------------------------------------------------------------------------------------------------------------------------------------------------------------------------------------------------------------------------------------------------------------------------------------------------------------------------------------------------------------------------------------------------------------------------------------------------------------------------------------------------------------------------------------------------------------------------------------------------------------------------------------------------------------------------------------------------------------------------------------------------------------------------------------------------------------------------------------------------------------------------------------------------------------------------------------------------------------------------------------------------------------------------------------------------------------------------------------------------------------------------------------------------------------------------------------------------------------------------------------------------------------------------------------------------------------------------------------------------------------------------------------------------------------------------------------------------------------------------------------------------------------------------------------------------------------------------------------------------------------------------------------------------------------------------------------------------------------------------------------------------------------------------------------------------------------------------------------------------------------------------------------------------------------------------------------------------------------------------------------------------------------------------------------------------------------------------------------------|
| <i>PbDRS-DRR 1</i> | ATGGAATTGCAATACTTCTCCTACTTCCAACCTACCTCTTCTGTTGTT<br>GCTTTGTTGTTGGCATTGGTCAGTATCTTGTTTTCCGTTGTTGTTTTG<br>AGAAAGACCTTCTCCAACAACCTATTCTTCTCCAGCTTCTTCTACTGAA<br>ACCGCTGTTTTGTGCATCAAAGACAACAATCTTGCGCCTTGCCAAT<br>TTCTGGTTTGTTCATGTTTTCATGAACAAGAACGGTTTGATCCATGT<br>TACCTTGGGTAATATGGCTGATAAGTACGGTCCAATTTTCTCTTTTTCC<br>AACCGTTCTCATAGAACCTTGTTGTTTTCTTCTTGGGAAATGGTCA<br>AAGAATGTTTCACCGGTAACAACGATACCGCCTTTTCTAATAGACCA<br>ATTCCATTGGCTTTCAAGACCATTTTCTATGCCTGTAGAGGTATCGAC<br>TCTTACGGTTTATCTTCTGTTCCATACGGTAAATATTGGAGAGAATTG<br>AGAAAGTTTTGCGTCCACAACCTTGTGTCCAATCAACAATTATTGAA<br>GTTCAGACACTTGATCATCTCCAAGTTGATACCTCCTTCAACAAGTT<br>ATACGAATTGTGCAAGAACTCCGAAGATAATCAAGGTATGGTTAGAA<br>TGGATGATTGGTTGGCTCAATTGTCTTCTCAGTTATTGGTAGAATC<br>GTTTGCAGTTTTCCAATCTGATCCAAAACTGGTGCTCATCTAGAGT<br>CGAACAAATCAAAGAAGCTATTAACGAAGCCTCTACTTCTCATGCTA<br>CTTCTCCAGTTTTCTGATAACGTTCCAATGTTGGGTTGGATCGATCAAT<br>TGACTGTTTTGACTAGAAACATGACCCATTGTGGTAAGAAGTTGGAT<br>TTGGTTGTCGAATCCATCATCAACGATCACAGACAAAAGAGAAGATT<br>CTCCAGAACAAAAGGTGGTGACGAAAAGGATGATGAACAAGATGAT<br>TTCATCGACATCTGCTTGTCCATTATGGAACAACCACAATTGCCAGG<br>TAACAACAATCCACCAAAAATCCCAATCAAGTCCATCGTTTTGGATAT<br>GATTGGTGCTGGTACTGATACCACTAAGTTGACTATTATTTGGACCTT<br>GTCCTTGTGTTGAACAACCCAAATGTTTTGGCTAAGGCCAAACAAG<br>AAGTTGACGCTCATTTTGAACCTAAGAAGAGATCTACCAACGAAGCT<br>TCTGTCTGTTGTTGATTTGATGATATTGGTAACTTGGTCTACATCCAA<br>GCCATTATCAAAGAATCCATGAGATTATACCCAGTCTCCCCAGTTGT<br>TGAAAGATTGTCATCTGAAGATTGTGTTGTTGGTGGTTTTTCATGTTCC<br>AGCTGGTACTAGATTGTGGGCTAATGTTTGGAAAATGCAAAGAGATC<br>CAAAGTTTTGGGATGACCCTTTTGGTTTTAGACCAGAAAGATTCTTG<br>TCCGACGAACAAAATGGTTGATGTTAGAGGTCAAATTACGAATT<br>ATTGCCATTTGGTGCCGGTAGAAGATTTGTCCAGGTGTTTCTTTCT<br>CTTGGATTTGATGCAATTGGTCTTGACCAGATTGATCTTGGAAATC<br>GAAATGAAATCTCCATCCGATAAGGTTGATATGACTGCTACTCCAGG<br>TTTGATGTCTTACAAAGTTGTTCCATTGGACATCTTGTTGACCCATAG<br>AAGAATCAAGTCTTGCCTTCAATTGGCCTCTTCTGAAAGAGATATGG<br>AATCTTCTGGTGTCCAGTTATCACTTTGAGATCTGGTAAAGTTATGC<br>CAGTTTTGGGTATGGGTACTTTTGAAGGCTGGTAAGGGTTCCGAA<br>AGAGAAAGATTGGCTATTTTGAAGGCCATCGAAGTTGGTTACAGATA<br>CTTTGATACTGCTGCTGCTTACGAAACCGAAGAAGTTTTAGGTGAAG<br>CTATTGCTGAAGCCTTGCAATTGGGTTAATCAAGTCAAGAGATGAA<br>TTATTCATTTCTCCATGTTGTGGTGTACTGATGCTCATCCAGATAGA<br>GTTTTGTTGGCATTGCAAACTCATTGAGAACTTGAAGTTGGAATAC<br>GTCGACTTGTACATGTTGCCATTTCCAGCTTCATTGAAGCCAGGTAA<br>GATTACCATGGATATCCAGAAGAAGATATCTGCCCAATGGATTATA<br>GATCTGTTTGGTCTGCTATGGAAGAATGCCAAAATTTGGGTTTGACC<br>AAGTCCATTGGTGTCTCTAATTTCTCCTGCAAAAAGTTGGAAGAATTG<br>ATGGCTACTGCTAACATTCCACCAGCTGTAATCAAGTTGAAATGTC<br>TCCAGCTTTCCAACAAAAGAAGTTGAGAGAATACTGCAACGCTAACA<br>ACATTTTGGTTTTCCGCCGTTTCTATTTTGGGTTCTAATGGTACTCCAT<br>GGGGTTCAAATGCTGTTTTAGGTTCTGAAGTCTTGAAGAAAGATTGCT<br>ATGGCCAAGGGTAAATCCGTTGCTCAAGTTTCAATGAGATGGGTTTA<br>TGAACAAGGTGCTTCTTGGTTGTTAAGTCTTTAGTGAAGAAAGAT |

|                           |                                                                                                                                                                                                                                                                                                                                                                                                                                                                                                                                                                                                                                                                                                                                                                                                                                                                                                                                                                                                                                                                                                                                                                                                                                                                                                                                                                                                                                                                                                                                                                                                                                                                                                                                                                                                                                                                                                                                                                                                                                                                                                                                                                                                                                                                                                                                                                                                                                                                                                                                                                                                                                                                                                                                                                                                               |
|---------------------------|---------------------------------------------------------------------------------------------------------------------------------------------------------------------------------------------------------------------------------------------------------------------------------------------------------------------------------------------------------------------------------------------------------------------------------------------------------------------------------------------------------------------------------------------------------------------------------------------------------------------------------------------------------------------------------------------------------------------------------------------------------------------------------------------------------------------------------------------------------------------------------------------------------------------------------------------------------------------------------------------------------------------------------------------------------------------------------------------------------------------------------------------------------------------------------------------------------------------------------------------------------------------------------------------------------------------------------------------------------------------------------------------------------------------------------------------------------------------------------------------------------------------------------------------------------------------------------------------------------------------------------------------------------------------------------------------------------------------------------------------------------------------------------------------------------------------------------------------------------------------------------------------------------------------------------------------------------------------------------------------------------------------------------------------------------------------------------------------------------------------------------------------------------------------------------------------------------------------------------------------------------------------------------------------------------------------------------------------------------------------------------------------------------------------------------------------------------------------------------------------------------------------------------------------------------------------------------------------------------------------------------------------------------------------------------------------------------------------------------------------------------------------------------------------------------------|
|                           | <p>TAAGAGAAAACCTTGAACATCTTCGACTGGCAATTGACCAAAGAAGAT<br/> AACGAAAAGATCGGTGAAATCCCACAATGCAGAATTTTGTCTGCTTA<br/> CTTCTTGGTTAGTCCAAAGGGTCCATTCAAGTCTCAAGAAGAATTAT<br/> GGGATGATAAGGCTTAA</p>                                                                                                                                                                                                                                                                                                                                                                                                                                                                                                                                                                                                                                                                                                                                                                                                                                                                                                                                                                                                                                                                                                                                                                                                                                                                                                                                                                                                                                                                                                                                                                                                                                                                                                                                                                                                                                                                                                                                                                                                                                                                                                                                                                                                                                                                                                                                                                                                                                                                                                                                                                                                                      |
| <p><i>PbDRS-DRR 2</i></p> | <p>ATGGAATTGCAATACTTCTCCTACTTCCAACCTACCTCTTCTGTTGTT<br/> GCTTTGTTGTTGGCATTGGTCAGTATCTTGTTTTCCGTTGTTGTTTTG<br/> AGAAAGACCTTCTCCAACAACCTATTCTTCTCCAGCTTCTTCTACTGAA<br/> ACCGCTGTTTTGTGCATCAAAGACAACAATCTTGCGCCTTGCCAAT<br/> TTCTGGTTTGTTCATGTTTTCATGAACAAGAACGGTTTGATCCATGT<br/> TACCTTGGGTAATATGGCTGATAAGTACGGTCCAATTTTCTCTTTTCC<br/> AACCGTTCTCATAGAACCTTGGTTGTTTCTTCTTGGGAAATGGTCA<br/> AAGAATGTTTACCGGTAACAACGATACCTTCTCAGCAACAGACCC<br/> ATACCATTAGCCTTTAAGATCATTCTTCTACGCCGGTGGTGTAGATAG<br/> CTATGGACTTGCTTTAGTGCCATATGGCAAGTACTGGAGGGAGTTGA<br/> GAAAAATTTGTGTTCACTTACTTTCAAACCAGCAACTTTTGA<br/> TTAGGCACTTAATAATTTCTCAAGTCGATACTTCTTCAATAAGCTGT<br/> ATGATTTGTCAAACAAAAAGAAAAACAACCACTGACTCTGGGACC<br/> GTTAGGATGGATGATTGGCTAGCTCAATTGTCCTTTAACGTCATTGG<br/> AAGGATTGTATGTGTTTTCAAACACATACGGAAACCTCCGCCACGT<br/> CAAGTGTGGAACGTTTACAGAAGCAATTGATGAAGCATCAAGATTC<br/> ATGTCAATTGCTACGGTCTCTGATACTTTTCCATGGTTGGTTGGAT<br/> AGATCAATTAACAGGTCTTACCCGTAAGATGAAACATTATGGTAAGA<br/> AGTTAGATTTGGTTGTTGAGAGCATTATCGAAGATCACAGGCAAAT<br/> AGAAGAATTTCCGGCACCAACAAGGAGACGATTTTATTGATATATG<br/> TCTGTCTATCATGGAGCAACCTCAAATAATCCAGGAAATAACGATC<br/> CTCCGAGGCAAATACCAATAAAATCTATTGTTTTAGATATGATAGGTG<br/> GAGGTACCGATACTACTAAATTGACTACAACCTTGGACATTAAGCTTAT<br/> TACTGAACAATCCACATGTTTTAGAAAAAGCCAGAGAAGAAGTAGAT<br/> GCTCATTTCGGTACAAAGAGGGCGTCCAACCTAACGATGACGCAGTCAT<br/> GGTGGAGTTTGTATGATATACGTAATCTAGTGTATATTCAAGCTATTAT<br/> TAAAGAGTCTATGAGACTTTACCCAGCATCACCAGTAGTCGAGCGTT<br/> TATCTGGTGAAGACTGTGTAGTTGGCGGTTTCCATGTTCCAGCTGGT<br/> ACTAGATTATGGGTTAATGTCTGGAAGATGCAGAGAGATCCGAATGT<br/> TTGGGCTGACCCGATGGTTTTAGACCTGAAAGATTCTTGTCTGACG<br/> AGCAGAAGATGGTCGACGTTAGAGGACAAAATTATGAATTGTTGCCT<br/> TTCGGTGCAGGTAGGAGAATATGTCCTGGTGTCTTTCTCCTTGGGA<br/> TTTGATGCAATTGGTCTTGACCAGATTGATCTTGGAAATCGAAATGAA<br/> GTCTCCATCCGGTAAGGTTGATATGACTGCTACTCCAGGTTTGTATGT<br/> CTTACAAAGTTGTTCCATTGGACATCTTGTTGACCCATAGAAGAATCA<br/> AGTCTTGCCTTCAATTGGCCTCTTCTGAAAGAGATATGGAATCTTCT<br/> GGTGTCCAGTTATCACTTTGAGATCTGGTAAAGTTATGCCAGTTTTG<br/> GGTATGGGTACTTTTGAAGCCATCGAAGTTGGTTACAGATACTTTGAT<br/> ACTGCTGCTGCTTACGAAACCGAAGAAGTTTTAGGTGAAGCTATTGC<br/> TGAAGCCTTGCAATTGGGTTAATCAAGTCAAGAGATGAATTATTCAT<br/> TTCCTCCATGTTGTGGTGTACTGATGCTCATCCAGATAGAGTTTTGTT<br/> GGCATTGCAAACTCATTGAGAACTTGAAGTTGGAATACGTCGACT<br/> TGTACATGTTGCCATTTCCAGCTTCAATTGAAGCCAGGTAAGATTACC<br/> ATGGATATCCAGAAGAAGATATCTGCCCAATGGATTATAGATCTGT<br/> TTGGTCTGCTATGGAAGAATGCCAAAATTTGGGTTTGACCAAGTCCA<br/> TTGGTGTCTCTAATTTCTCCTGCAAAAAGTTGGAAGAATTGATGGCTA<br/> CTGCTAACATTCCACCAGCTGTAATCAAGTTGAAATGTCTCCAGCT<br/> TTCCAACAAAAGAAGTTGAGAGAATACTGCAACGCTAACAACATTTT<br/> GGTTTCCGCCGTTTCTATTTTGGGTTCTAATGGTACTCCATGGGGTT<br/> CAAATGCTGTTTTAGGTTCTGAAGTCTTGAAGAAGATTGCTATGGCC<br/> AAGGGTAAATCCGTTGCTCAAGTTTCAATGAGATGGGTTTATGAACA</p> |

|                  |                                                                                                                                                                                                                                                                                                                                                                                                                                                                                                                                                                                                                                                                                                                                                                                                                                                                                                                                                                                                                                                                                                                                                                                                                                                                                                                                                                                                                                                                                                                                                                                                                                                                                                                                                                                                                                                                                                                                                                                                                                                                                                                                                                                                                                                                                                                                                                                                                                                                                                                                                                                                                                                                                                             |
|------------------|-------------------------------------------------------------------------------------------------------------------------------------------------------------------------------------------------------------------------------------------------------------------------------------------------------------------------------------------------------------------------------------------------------------------------------------------------------------------------------------------------------------------------------------------------------------------------------------------------------------------------------------------------------------------------------------------------------------------------------------------------------------------------------------------------------------------------------------------------------------------------------------------------------------------------------------------------------------------------------------------------------------------------------------------------------------------------------------------------------------------------------------------------------------------------------------------------------------------------------------------------------------------------------------------------------------------------------------------------------------------------------------------------------------------------------------------------------------------------------------------------------------------------------------------------------------------------------------------------------------------------------------------------------------------------------------------------------------------------------------------------------------------------------------------------------------------------------------------------------------------------------------------------------------------------------------------------------------------------------------------------------------------------------------------------------------------------------------------------------------------------------------------------------------------------------------------------------------------------------------------------------------------------------------------------------------------------------------------------------------------------------------------------------------------------------------------------------------------------------------------------------------------------------------------------------------------------------------------------------------------------------------------------------------------------------------------------------------|
|                  | AGGTGCTTCCTTGTTGTTAAGTCCTTTAGTGAAGAAAGATTAAGAG<br>AAAACCTTGAACATCTTCGACTGGCAATTGACCAAAGAAGATAACGAA<br>AAGATCGGTGAAATCCCACAATGCAGAATTTTGTCTGCTTACTTCTTG<br>GTTAGTCCAAAGGGTCCATTCAAGTCTCAAGAAGAATTATGGGATGA<br>TAAGGCTTAA                                                                                                                                                                                                                                                                                                                                                                                                                                                                                                                                                                                                                                                                                                                                                                                                                                                                                                                                                                                                                                                                                                                                                                                                                                                                                                                                                                                                                                                                                                                                                                                                                                                                                                                                                                                                                                                                                                                                                                                                                                                                                                                                                                                                                                                                                                                                                                                                                                                                                     |
| <i>PsDRS-DRR</i> | ATGGAATTGCAATACATCTCCTACTTCCAACCTACCTCTTCTGTTGTT<br>GCTTTGTTGTTGGCATTGGTCAGTATCTTGTCTTCCGTTGTTGTTTTG<br>AGAAAGACCTTCCTAAACAACCTATTCTTCTTCACCAGCTTCTTCTACT<br>AAGACCGCTGTTTTGTCTCATCAAAGACAACAATCTTGCGCCTTGCC<br>AATTTCTGGTTTGTTCATATTTTCATGAACAAGAACGGTTTGATCCA<br>TGTTACCTTGGGTAATATGGCTGATAAGTACGGTCCAATTTTCTCTTT<br>TCCAACCGTTCTCATAGAACCTTGGTTGTTTCTTCTTGGGAAATGG<br>TCAAAGAATGTTTACCAGGTAACAACGATACCGCCTTTTCTAATAGA<br>CCAATTCATTGGCTTTCAAGACCATTTTCTATGCCTGTGGAGGTAT<br>CGACTCTTACGGTTTATCTTCTGTTCCATACGGTAAATATTGGAGAGA<br>ATTGAGAAAGGTTTGCCTCCACAACCTGTTGTCCAATCAACAATTATT<br>GAAGTTCAGACACTTGATCATCTCCCAAGTTGATACCTCCTTCAACA<br>AGTTATACGAATTGTGCAAGAACTCCGAAGATAATCATGGTAATTACA<br>CGACAACAACCACTACAGCTGCAGGTATGGTTAGAATCGATTGG<br>TTGGCTGAATTGCTCCTTCAACGTTATTGGTAGAATCGTTTGGCGTTTC<br>CAATCTGGTCCAAAAACTGGTGCTCCATCTAGAGTCAACAATTCAA<br>AGAAGCTATTAACGAAGCCTCCTACTTTCATGTCTACTTCTCCAGTTTC<br>TGATAACGTTCCAATGTTGGGTTGGATCGATCAATTGACTGGTTTGA<br>CTAGAAACATGAAGCATTGTGGTAAGAAGTTGGATTTGGTTGTCGAA<br>TCCATCATCAACGATCACAGACAAAAGAGAAGATTCTCCAGAACAAA<br>AGGTGGTGACGAAAAGGATGATGAACAAGATGATTTTCATCGACATCT<br>GCTTGTCCATTATGGAACAACCACAATTGCCAGGTAACAACAATCCA<br>TCACAAATCCCAATCAAGTCCATCGTTTTGGATATGATTGGTGGAGG<br>TACTGATACCACTAAGTTGACTACAATTTGGACCTTGTCTTGTGTT<br>GAACAACCCACATGTTTTGGATAAGGCCAAACAAGAAGTTGACGCTC<br>ATTTTAGGACTAAGAGAAGATCTACCAACGACGCTGCAGCCGCCGTT<br>GTTGATTTTCGATGATATTCGTAACCTTGGTCTACATCCAAGCCATTATC<br>AAAGAATCCATGAGATTATACCCAGCTTCCCCAGTTGTTGAAAGATT<br>GTCAGGTGAAGATTGTGTTGTTGGTGGTTTTTCATGTTCCAGCTGGTA<br>CTAGATTGTGGGCTAATGTTTGGAAAATGCAAAGAGATCCAAAGGTT<br>TGGGATGACCCTTTGGTTTTTAGACCAGATAGATTCTTGTCCGACGA<br>ACAAAAAATGGTTGATGTTAGAGGTCAAATTACGAATTATTGCCATT<br>TGGTGCCGGTAGAAGAGTTTGTCCAGGTGTTTCTTCTCCTTGGATT<br>TGATGCAATTGGTCTTGACCAGATTGATCTTGGAAATCGAAATGAAG<br>TCTCCATCCGGTAAGGTTGATATGACTGCTACTCCAGGTTTGTGTC<br>TTACAAAGTTATTCCATTGGACATCTTGTGACCCATAGAAGAATCAA<br>GCCTTGCCTTCAATCTGCCGCTTCTGAAAGAGATATGGAATCTTCTG<br>GTGTTCCAGTTATCACTTTGGGTTCTGGTAAAGTTATGCCAGTTTTG<br>GGTATGGGTACTTTTGAAGGTCGGTAAGGGTTCCGAAAGAGAAA<br>GATTGGCTATTTTGAAGGCCATCGAAGTTGGTTACAGATACTTTGAT<br>ACTGCTGCTGCTTACGAAACCGAAGAAGTTTTAGGTGAAGCTATTGC<br>TGAAGCCTTGCAATTGGGTTTAGTAAAGTCAAGAGATGAATTATTCAT<br>TTCCTCCATGTTGTGGTGTACTGATGCTCATGCTGATAGAGTTTTGTT<br>GGCATTGCAAAACTCATTGAGAAACTTGAAGTTGGAATACGTCGACT<br>TGACATGTTGCCATTTCCAGCTTCATTGAAGCCAGGTAAGATTACC<br>ATGGATATCCCAGAAGAAGATATCTGCAGAATGGATTATAGATCTGT<br>TTGGGCAGCTATGGAAGAATGCCAAAATTTGGGTTTTACCAAGTCCA<br>TTGGTGTCTCTAATTTCTCCTGCAAAAAGTTGCAAGAATTGATGGCTA<br>CTGCTAACATTCCACCAGCTGTAATCAAGTTGAAATGTCTCCAGCT<br>TTCCAACAAAAGAAGTTGAGAGAATACTGCAACGCTAACAACATTTT<br>GGTTTCCGCCATTTCTGTTTTGGGTTCTAATGGTACTCCATGGGGTT |

|               |                                                                                                                                                                                                                                                                                                                                                                                                                                                                                                                                                                                                                                                                                                                                                                                                                                                                                                                                                                                                                                                                                                                                                                                                                                                                                                                                                                                                                                                                                                                                                                                                                                                                                                                                                                                                                                                                                                                                                                                                                                                                                                                                                                                                                                                                                                                                                                                                                                                                                                                                                                                                                                                                                |
|---------------|--------------------------------------------------------------------------------------------------------------------------------------------------------------------------------------------------------------------------------------------------------------------------------------------------------------------------------------------------------------------------------------------------------------------------------------------------------------------------------------------------------------------------------------------------------------------------------------------------------------------------------------------------------------------------------------------------------------------------------------------------------------------------------------------------------------------------------------------------------------------------------------------------------------------------------------------------------------------------------------------------------------------------------------------------------------------------------------------------------------------------------------------------------------------------------------------------------------------------------------------------------------------------------------------------------------------------------------------------------------------------------------------------------------------------------------------------------------------------------------------------------------------------------------------------------------------------------------------------------------------------------------------------------------------------------------------------------------------------------------------------------------------------------------------------------------------------------------------------------------------------------------------------------------------------------------------------------------------------------------------------------------------------------------------------------------------------------------------------------------------------------------------------------------------------------------------------------------------------------------------------------------------------------------------------------------------------------------------------------------------------------------------------------------------------------------------------------------------------------------------------------------------------------------------------------------------------------------------------------------------------------------------------------------------------------|
|               | <p>CAAATGCTGTTTTAGGTTCTGAAGTCTTGAAAAAGATTGCTATGGCC<br/> AAGGGTAAATCCGTTGCTCAAGTTTCAATGAGATGGGTTTATGAACA<br/> AGGTGCTTCCTTGGTTGTTAAGTCTTTAGTGAAGAAAGATTAAGAG<br/> AAAAC TTGAACATCTTCGACTGGGAATTGACCAAAGAAGATCATGAA<br/> AAGATCGGTGAAATCCCACAATGCAGAATTTTGTCTGCTTACTTCTTG<br/> GTTAGTCCAAACGGTCCATTCAAGTCTCAAGAAGAATTATGGGATGA<br/> TGAAGCTTAA</p>                                                                                                                                                                                                                                                                                                                                                                                                                                                                                                                                                                                                                                                                                                                                                                                                                                                                                                                                                                                                                                                                                                                                                                                                                                                                                                                                                                                                                                                                                                                                                                                                                                                                                                                                                                                                                                                                                                                                                                                                                                                                                                                                                                                                                                                                                                                               |
| <i>PbREPI</i> | <p>ATGGA ACTACAATATTTCTCTTACTTCCAGCCACTAGTAGTGTGTT<br/> GCTCTACTACTGGCTCTTGTTCATTTTGTGTTAGCGTAGTGGTTCTG<br/> CGTAAGACGTTCTCCAACAATTATTCAAGTCCAGCCAGTTCCACCGA<br/> GACTGCGGTATTATGCCACCAACGTCAGCAAAGCTGCGCCTTACCG<br/> ATTAGTGGCTTGTGTCACGCTTCATGAATAAAAACGGACTAATACA<br/> CGTAACCTTAGGCAACATGGCGGATAAGTATGGTCCGATATTTTCAT<br/> TCCAACGGGTAGCCACAGGACACTGGTGGTTTCTCTTGGGAAAT<br/> GGTCAAAGAATGTTTTACAGGAAATAACGACACCGCTTTCAGTAATA<br/> GGCCAATCCCTCTAGCATTTTACAGACGATTTTTTATGCGTGCGGCGGC<br/> ATTGACTCATACGGCTTGAGCAGCGTCCCCTACGGAAAAGTATTGGC<br/> GTGAACTACGTAAAGTTTGTGTGCACAATCTATTAAGCAATCAACAG<br/> CTATTGAAATTTAGGCATTTGATAATTTTACAAGTGGACACGCTTTTC<br/> AACAAATTATACGAACGTGTGTA AAAACAGTGAGGACAATCAGGGGAT<br/> GGTCAGAATGGATGACTGGCTAGCACAACGTCTCTTTAATGTCATTG<br/> GGAGAATCGTGTGCGGGTTTCAATCCGACCCGAAAACGGGCGCACC<br/> CAGTAGGGTCGAGCAGTTCAAGGAAGTAATAAATGAGGCCTCCTAC<br/> TTTATGTCCACGTCCCCTGTGAGCGACAATGTGCCCATGCTTGGCTG<br/> GATCGACCAACTGACGGGCTGACAAGAAATATGAAACATTGCGGA<br/> AAGAACTGGACCTGGTAGTAGAGTCTATCATAAAGGATCACCGTCA<br/> GAAGCGTAGATTTAGCAGAACCAAAGGCGGCGACGAGAAAGACGAC<br/> GAGCAGGATGATTTTATTGACATATGTTTGAGCATTATGGAACAGCC<br/> GCAGTTACCCGGAATAATTTCCCCTCCCAAATCCCAATAAAGAGCA<br/> TAGTTTTAGACATGATTGGCGGTGGAACGGATACTACTAAGCTGACC<br/> ACCATATGGACACTAAGTTTGTGCTAAATAACCCCATGTCTTAGAT<br/> AAGGCTAAACAAGAGGTGGATGCCCATTTTGA AAAAAAAAAAGAAGT<br/> CACCGACGATGCCGCCGTGCAGTGGTTGATTTTATGACATCCGT<br/> AACTTAGTTTACATCCAGGCGATCATCAAGGAATCAATGAGGCTGTA<br/> TCCTGCTTCTCCAGTAGTTGAGAGGTTAAGCGGAGAGGACTGCGTA<br/> GTTGGTGGATTTACGTTGCCCGCAGGGACGCGTTTATGGGCCAACG<br/> TTTGGAAAATGCAGAGGGACCCGAAAGTGTGGGACGATCCATTAGT<br/> TTTTAGGCCGGAAGATTCTTATCTGATGAGCAGAAAATGGTAGACG<br/> TGCGTGGACAGAATTACGAGCTTTTCCCCTTTGGAGCAGGCAGGAG<br/> GATTTGCCCGGGGTGTCATTAGCTTAGATTTGATGCAACTGGTTC<br/> TAACACGTCTAATACTTGAATTTGAAATGAAGAGTCTTCCGGAAAAG<br/> GTAGACATGACAGCGACCCCGGTCTAATGTCCTACAAAGTCGTTT<br/> CCTTAGATATCCTGCTTACTCACCGTCTATTA AAAAGTTGTGTCCAAT<br/> TAGCGTCTAGTGAAAGAGATATGGAGAGTAGTGGGGTTCCAGTGAT<br/> TACTTTGTCTTCCGGTAAGGTCATGCCTGTATTAGGAATGGGAACGT<br/> TCGAAAAAGTCGGCAAGGGCAGCGAACGTGAGAGATTAGCGATTCT<br/> GAAGGCTATTGAAGTAGGATACAGATACTTTGACACTGCAGCGGCTT<br/> ACGAGACGGAAGAGGTGCTGGGTGAAGCAATTGCCGAGGCACTTCA<br/> ACTAGGACTGATCGAATCCAGAGATGAATTGTTTATCTCTTCTATGCT<br/> ATGGTGCACGGATGCACACCCTGACCGTGTCTTCTTGCACCTCAA<br/> ACAGCTTGAGGAACCTTAAACTGGAGTACCTAGACCTTTACATGCTG<br/> CCTTTCCCGGCTAGCTTAAAACCGGGCAAGATCACGATGGACATTC<br/> CGGAGGAGGATATCTGTAGGATGGACTATCGTTTCAAGTGTGGTCTGC<br/> CATGGAGGAATGTCAGAACCTAGGATTTACCAAAGTATCGGCGTCA<br/> GTAAC TTTTCTGCAAGAACTACAGGAGTTGATGGCGACTGCTAAC<br/> ATCCCCCAGCCGTCAATCAAGTCGAAATGTCCCCAGCTTTCCAGCA</p> |

|              |                                                                                                                                                                                                                                                                                                                                                                                                                                                                                                                                                                                                                                                                                                                                                                                                                                                                                                                                                                                                                                                                                                                                                                                                                                                                                                                                                                                                                                                                                                                                                                                                                                                                                                                                                                                                                         |
|--------------|-------------------------------------------------------------------------------------------------------------------------------------------------------------------------------------------------------------------------------------------------------------------------------------------------------------------------------------------------------------------------------------------------------------------------------------------------------------------------------------------------------------------------------------------------------------------------------------------------------------------------------------------------------------------------------------------------------------------------------------------------------------------------------------------------------------------------------------------------------------------------------------------------------------------------------------------------------------------------------------------------------------------------------------------------------------------------------------------------------------------------------------------------------------------------------------------------------------------------------------------------------------------------------------------------------------------------------------------------------------------------------------------------------------------------------------------------------------------------------------------------------------------------------------------------------------------------------------------------------------------------------------------------------------------------------------------------------------------------------------------------------------------------------------------------------------------------|
|              | <p>GAAAAAATTGAGGGAATATTGTAACGCTAATAATATCCTGGTAAGTG<br/> CTGTCTCTATATTGGGGTCTAACGGCACACCGTGGGGCTCAAATGC<br/> AGTTCTTGGAAGCGAGGTTCTAAAACAGATAGCTATGGCTAAAGGCA<br/> AAAGCGTAGCACAGGTGTCAATGCGTTGGGTTTATGAACAGGGTGC<br/> CAGTCTGGTGGTGAAGTCATTGAGCGAAGAGAGACTGAGGGAGAAT<br/> CTGAACATCTTTGATTGGGAACTAACAAAGGAGGACAACGAGAAGAT<br/> AGGAGAAATCCCCAGTGTAGAATCTTGACTGCGTATTTCTGGTCT<br/> CACCTAACGGTCCGTTTTAAAGCCAGGAGGAATTATGGGATGACAA<br/> GGCT</p>                                                                                                                                                                                                                                                                                                                                                                                                                                                                                                                                                                                                                                                                                                                                                                                                                                                                                                                                                                                                                                                                                                                                                                                                                                                                                                                                                                           |
| <i>PrDRS</i> | <p>ATGGAGTACAGCGATTTACAATTGTTTGGTTTCCAGCCCACAAGCGT<br/> CGTAGCATTATTGCTGGCGTTGGTCTCCATTTTGTAGGCGTCATTG<br/> CGGTGTCACACCACAGGGCGAAGCCTTCTTGCTCTGCCCATGAT<br/> CGGTTTATACCACGTTTTTATGAATAAGACAGGTTTAAATTCATGTAAC<br/> ACTTGGGAACATGGCAGATAAGTACGGGCCCATCTTCAGCTTCCA<br/> ACGGGAGGCCACAGAGCCCTGGTTGTCTCCTCTTGGGAAATGGCCA<br/> AGGAATGTTTCACAGGTGACAACGATATCGTCTTCAGTAACCGTCCT<br/> ATGCCGCTATCCTTCAAGATAATTTCAACGCGGGTGGTATAGATTC<br/> CGCCGGACTGACCCAAGTTCCTTATGGGAAGTATTGGCGTGAGTTG<br/> AGGAAGATTTGCGTCCACAACCTTTTGGTAATCAGCAGTACTTAA<br/> ATTCCGTCACTTAATAAACTCTCAGGTTGACACATCCTTTACAAAAT<br/> ATACGAGTCTTGTAACAAGGGGAATAGTGGCATGGTGAGGATGGAC<br/> GACTGGTTAGGAGAATTGTCATTCAACGTAATAGGACGTATAGTCTG<br/> CGGCTTTAGGAGCGATACTGAAACCTCTGCGACAAGTAGTGCGGAA<br/> AGGTTACGGTAGCAATCGATGAAGCAAGTCGTTTTATGTCCATACC<br/> AGCGGTCTCTGATACCTTCCCTTGGCTTGGTTGGATTGATCGTCTTA<br/> CTGGTTTAAATCAAGGACATGAAACACCACGCGGAAAAATTAGACCTA<br/> GTTGTGGAGTCCATTATAGAGGACCACAGGCAAAAGAGACGTTTCTC<br/> TCGTACGAAGAAGGGAGACGAGAATAACACAGAAGACGAGCAGGAT<br/> GATTTATAGACATATGTTTGTCCATCATGGAGCAACCAGAGTTACC<br/> GGGGAACAACATATGCACGTCAAATGCCTATTAAGAGTATCATTGTTG<br/> ATATGATTGGCGGTGCCACTGACACGACAAAACGACAACGATATG<br/> GACACTATCCTTATTGCTGAATAACCCCCACGTATTAGGAAAAGCAA<br/> AGGAGGAGGTAGATGCGCATTTTGGAAAGAAGCGTAGCAGCACGAA<br/> CGGTGAAGTAATGGTTGATTTGACGATATCAGAAGCTTAGTGTACA<br/> TTCAGGCTATAATAAAGGAAAGCATGAGATTATATCCCGCTTCTCCA<br/> GTTGTGGAAAGGTTGAGCAGTGAAGACTGCGTAGTCGGCGGCTTTC<br/> ACGTGATCCTGAAGTTTGGGATGACCCTAGTGTATTCCGTCCAGAGA<br/> GATTCCTGAGTAACGAGCAAAAGATGGTAGATGTCAGGGGGCAGGA<br/> TTACGAGCTACTTCTTTTGGAGCTGGACGTCGTATTTGTCTGGCG<br/> TATCCTTTAGCTTGGATTTGATGCATCTAGTCTTAACCAGGTTGATCC<br/> TGGAGTTTGAATCAAATCCCCCGGTGGAGAGGTTGACATGACTGC<br/> AACGCAGGGGCTTATGTCTTACAAGGTCGTGCCATTGGACATCCTG<br/> CTAACAGAAGAATGTTG</p> |
| <i>PrDRR</i> | <p>ATGGATAGTAGCGGGTCCCTGTAATTCCGCTAAGCAGCGGAAAGG<br/> GTATGCCGGCGCTGGCATTAGGGACGTTTGGAGACCTTTGGGAAAGG<br/> TTCCTCAGAAAGGCAAAGGAGCGCATTTTTGAAGGCGATCGAGGTA<br/> GGTTATAGATACTTTGACACTGGCGCATCATATGGGACAGAGGAGG<br/> TTCTTGGTGAGGCTATAGACGAGGCACTTCAGTTAGGACTTATAGAA<br/> AGCAGAGAGGAGTTATTTATTAGCTCAAATCTATGGTGTACTGACGC<br/> CCACCCCGATAGAGTGTTACTTGCTCTACAGAACTCACTTAGGAACC<br/> TGAAGTTGGAATACCTTGATCTATACATGATTCCTTTCCAATAAGTT<br/> TAAAACCAGGGAAAGATAATGGAAGAGATAACCATGGACATACCGGA<br/> AGACGAAATGTTACCGATGGACTACAAAAGCGTCTGGGCCGCTATG<br/> GAAGAATGCCAGGATCTAGGGTTCACAAAAGCATCGGTGTTTCTAA<br/> CTTTAGTTGTAAGAACTACAAGAGTTAATGGCAACCGCGAATATCC</p>                                                                                                                                                                                                                                                                                                                                                                                                                                                                                                                                                                                                                                                                                                                                                                                                                                                                                                                                                                                                                                                                                                                                                                  |

|                 |                                                                                                                                                                                                                                                                                                                                                                                                                                                                                                                                                                                                                                                                                                                                                                                                                                                                                                                                                                                                                                                                                                                                                                                                                                                                                                                                                                                                                                                                                                                                                                                                                                                                                                                                                                                                                                                                                                                                                           |
|-----------------|-----------------------------------------------------------------------------------------------------------------------------------------------------------------------------------------------------------------------------------------------------------------------------------------------------------------------------------------------------------------------------------------------------------------------------------------------------------------------------------------------------------------------------------------------------------------------------------------------------------------------------------------------------------------------------------------------------------------------------------------------------------------------------------------------------------------------------------------------------------------------------------------------------------------------------------------------------------------------------------------------------------------------------------------------------------------------------------------------------------------------------------------------------------------------------------------------------------------------------------------------------------------------------------------------------------------------------------------------------------------------------------------------------------------------------------------------------------------------------------------------------------------------------------------------------------------------------------------------------------------------------------------------------------------------------------------------------------------------------------------------------------------------------------------------------------------------------------------------------------------------------------------------------------------------------------------------------------|
|                 | <p>CCCCGCCGTAATCAGGTGGAGATGAGCCCCGTCTTTCAACAAA<br/> GAAGTTACGTGAATACTGCAAAGCAAACAACATTTTGGTTTCTGCTG<br/> TGAGCGTTTTAGGTTCCAACGGGACAGCATGGGGAAGTAACCAAGT<br/> GATGGGATCCGAGGTCTTGAACAAATTGCTACAGACAGAGGAAAG<br/> TCCGTAGCCCAGATAAGCATGCGTTGGGTCTATGAGCAGGGCGCTA<br/> GTCTAGTAGTTAAGAGCTTCAACGAGGTGCGTATGAGAGAAAATCTT<br/> AACATCTTCAACTGGCAATTGACCAAGGAGGATTTAGAAAAGATTTT<br/> CGAGATCCCTCAGTGTAGAATACTGACGGGTGACTTCCTTGTGAGT<br/> GCGAATGGCCCTTCAAAGCCTACAGGAAGTGTGGGATGATCAAG<br/> TC</p>                                                                                                                                                                                                                                                                                                                                                                                                                                                                                                                                                                                                                                                                                                                                                                                                                                                                                                                                                                                                                                                                                                                                                                                                                                                                                                                                                                                                                                                                |
| <i>PbDRS V1</i> | <p>ATGGAATTGCAATACTTCTCCTACTTCCAACCTACCTCTTCTGTTGTT<br/> GCTTTGTTGTTGGCATTGGTCAGTATCTTGTTTTCCGTTGTTGTTTTG<br/> AGAAAGACCTTCTCCAACAACCTATTCTTCTCCAGCTTCTTCTACTGAA<br/> ACCGCTGTTTTGTGTCATCAAAGACAACAATCTTGCGCCTTGCCAAT<br/> TTCTGGTTTGTGTCATGTTTTCATGAACAAGAACGGTTTGATCCATGT<br/> TACCTTGGGTAATATGGCTGATAAGTACGGTCCAATTTTCTCTTTTCC<br/> AACCGGTTCTCATAGAACCTTGTTGTTTCTTCTTGGGAAATGGTCA<br/> AAGAATGTTTCACCGGTAACAACGATACCGCCTTTTCTAATAGACCA<br/> ATTCCATTGGCTTTCAAGACCATTTTCTATGCCTGTAGAGGTATCGAC<br/> TCTTACGGTTTATCTTCTGTTCCATACGGTAAATATTGGAGAGAATTG<br/> AGAAAGGTTTTCGCTCCACAACCTGTTGTCCAATCAACAATTATTGAA<br/> GTTTCAGACACTTGATCATCTCCAAGTTGATACCTCCTTCAACAAGTT<br/> ATACGAATTGTGCAAGAACTCCGAAGATAATCAAGGTATGGTTAGAA<br/> TGGATGATTGGTTGGCTCAATTGTCTTCTCAGTTATTGGTAGAATC<br/> GTTTTCGGTTTCCAATCTGATCCAAAACTGGTGTCTCCATCTAGAGT<br/> CGAACAATTCAAAGAAGCTATTAACGAAGCCTCCTACTTCATGTCTA<br/> CTTCTCCAGTTTCTGATAACGTTCCAATGTTGGGTTGGATCGATCAAT<br/> TGACTGGTTTACTAGAAACATGACCCATTGTGGTAAGAAGTTGGAT<br/> TTGGTTGTCGAATCCATCATCAACGATCACAGACAAAAGAGAAGATT<br/> CTCCAGAACAAAAGGTGGTGACGAAAAGGATGATGAACAAGATGAT<br/> TTCATCGACATCTGCTTGTCCATTATGGAACAACCACAATTGCCAGG<br/> TAACAACAATCCACCAAAAATCCAATCAAGTCCATCGTTTTGGATAT<br/> GATTGGTGCTGGTACTGATACCACTAAGTTGACTATTATTTGGACCTT<br/> GTCCTTGTGTTGAACAACCCAAATGTTTTGGCTAAGGCCAAACAAG<br/> AAGTTGACGCTCATTTTGAACCTAAGAAGAGATCTACCAACGAAGCT<br/> TCTGTCTGTTGTTGATTTTCGATGATATTGGTAACCTTGGTCTACATCCA<br/> GCCATTATCAAAGAATCCATGAGATTATACCCAGTCTCCCCAGTTGT<br/> TGAAAGATTGTCTGATCTGAAGATTGTGTTGTTGGTGGTTTTTCATGTTCC<br/> AGCTGGTACTAGATTGTGGGCTAATGTTTGGAAAATGCAAAGAGATC<br/> CAAAGGTTTGGGATGACCTTTGGTTTTAGACCAGAAAAGATTCTTG<br/> TCCGACGAACAAAAAATGGTTGATGTTAGAGGTCAAATTACGAATT<br/> ATTGCCATTTGGTGCCGGTAGAAGAATTTGTCCAGGTGTTTCTTTCT<br/> CCTTGGATTTGATGCAATTGGTCTTGACCAGATTGATCTTGGAAATC<br/> GAAATGAAATCTCCATCCGATAAGGTTGATATGACTGCTACTCCAGG<br/> TTTGATGCTTACAAAGTTGTTCCATTGGACATCTTGTTGACCCATAG<br/> AAGAATC</p> |
| <i>PbDRS V2</i> | <p>ATGGAATTGCAATACTTCTCCTACTTCCAACCTACCTCTTCTGTTGTT<br/> GCTTTGTTGTTGGCATTGGTCAGTATCTTGTTTTCCGTTGTTGTTTTG<br/> AGAAAGACCTTCTCCAACAACCTATTCTTCTCCAGCTTCTTCTACTGAA<br/> ACCGCTGTTTTGTGTCATCAAAGACAACAATCTTGCGCCTTGCCAAT<br/> TTCTGGTTTGTGTCATGTTTTCATGAACAAGAACGGTTTGATCCATGT<br/> TACCTTGGGTAATATGGCTGATAAGTACGGTCCAATTTTCTCTTTTCC<br/> AACCGGTTCTCATAGAACCTTGTTGTTTCTTCTTGGGAAATGGTCA<br/> AAGAATGTTTCACCGGTAACAACGATACCGCCTTTTCTAATAGACCA<br/> ATTCCATTGGCTTTCAAGACCATTTTCTATGCCTGTAGAGGTATCGAC<br/> TCTTACGGTTTATCTTCTGTTCCATACGGTAAATATTGGAGAGAATTG</p>                                                                                                                                                                                                                                                                                                                                                                                                                                                                                                                                                                                                                                                                                                                                                                                                                                                                                                                                                                                                                                                                                                                                                                                                                                                                                                                                                                                                |

|          |                                                                                                                                                                                                                                                                                                                                                                                                                                                                                                                                                                                                                                                                                                                                                                                                                                                                                                                                                                                                                                                                                                                                                                                                                                                                                                                                                                                                                                                                                                                                                                                                                                                                                                                    |
|----------|--------------------------------------------------------------------------------------------------------------------------------------------------------------------------------------------------------------------------------------------------------------------------------------------------------------------------------------------------------------------------------------------------------------------------------------------------------------------------------------------------------------------------------------------------------------------------------------------------------------------------------------------------------------------------------------------------------------------------------------------------------------------------------------------------------------------------------------------------------------------------------------------------------------------------------------------------------------------------------------------------------------------------------------------------------------------------------------------------------------------------------------------------------------------------------------------------------------------------------------------------------------------------------------------------------------------------------------------------------------------------------------------------------------------------------------------------------------------------------------------------------------------------------------------------------------------------------------------------------------------------------------------------------------------------------------------------------------------|
|          | <p>AGAAAGGTTTGCCTCCACAACCTTGTGTCCAATCAACAATTATTGAA<br/> GTTTCAGACACTTGATCATCTCCCAAGTTGATACCTCCTTCAACAAGTT<br/> ATACGAATTGTGCAAGAACTCCGAAGATAATCAAGGTATGGTTAGAA<br/> TGGATGATTGGTTGGCTCAATTGTCTTCTCAGTTATTGGTAGAATC<br/> GTTTGCAGTTTCCAATCTGATCCAAAACTGGTGTCCATCTAGAGT<br/> CGAACAATTCAAAGAAGCTATTAACGAAGCCTCCTACTTCATGTCTA<br/> CTTCTCCAGTTTCTGATAACGTTCCAATGTTGGGTTGGATCGATCAAT<br/> TGACTGGTTTACTAGAAACATGACCCATTGTGGTAAGAAGTTGGAT<br/> TTGGTTGTGCAATCCATCATCAACGATCACAGACAAAAGAGAAGATT<br/> CTCCAGAACAAAAGGTGGTGACGAAAAGGATGATGAACAAGATGAT<br/> TTCATCGACATCTGCTTGTCCATTATGGAACAACCACAATTGCCAGG<br/> TAACAACAATCCACCAAAAATCCCAATCAAGTCCATCGTTTTGGATAT<br/> GATTGGTGCTGGTACTGATACCACTAAGTTGACTATTATTTGGACCTT<br/> GTCCTTGTGTTGAACAACCCAAATGTTTTGGCTAAGGCCAAACAAG<br/> AAGTTGACGCTCATTTTGAACATAAGAAGAGATCTACCAACGAAGCT<br/> TCTGTCTGTTGTTGATTTTCGATGATATTGGTAACTTGGTCTACATCCAA<br/> GCCATTATCAAAGAATCCATGAGATTATACCCAGTCTCCCCAGTTGT<br/> TGAAAGATTGTCATCTGAAGATTGTGTTGTTGGTGGTTTTTCATGTTCC<br/> AGCTGGTACTAGATTGTGGGCTAATGTTTGGAAAATGCAAAGAGATC<br/> CAAAGGTTTGGGATGACCCTTTGGTTTTAGACCAGAAAGATTCTTG<br/> TCCGACGAACAAAATGTTGATGTTAGAGGTCAAATTACGAATT<br/> ATTGCCATTTGGTGCCGGTAGAAGATTTGTCCAGGTGTTTCTTTCT<br/> CCTTGGATTTGATGCAATTGGTCTTGACCAGATTGATCTTGGAAATC<br/> GAAATGAAATCTCCATCCGATAAGGTTGATATGACTGCTACTCCAGG<br/> TTTGATGTCTTACAAA</p>                                                                                                                                                                                                                                                                                                                                                                      |
| PbDRS V3 | <p>ATGGAATTGCAATACTTCTCCTACTTCCAACCTACCTCTTCTGTTGTT<br/> GCTTTGTTGTTGGCATTGGTCAGTATCTTGTTTTCCGTTGTTGTTTTG<br/> AGAAAGACCTTCTCCAACAACCTATTCTTCTCCAGCTTCTTCTACTGAA<br/> ACCGCTGTTTTGTGCATCAAAGACAACAATCTTGCGCCTTGCCAAT<br/> TTCTGGTTTGTGTCATGTTTTTCATGAACAAGAACGGTTTGATCCATGT<br/> TACCTTGGGTAATATGGCTGATAAGTACGGTCCAATTTTCTCTTTTCC<br/> AACCGGTTCTCATAGAACCTTGGTTGTTTCTTCTTGGGAAATGGTCA<br/> AAGAATGTTTACCGGTAACAACGATACCGCCTTTTCTAATAGACCA<br/> ATTCCATTGGCTTTCAAGACCATTTTCTATGCCTGTAGAGGTATCGAC<br/> TCTTACGGTTTATCTTCTGTTCCATACGGTAAATATTGGAGAGAATTG<br/> AGAAAGGTTTGCCTCCACAACCTTGTGTCCAATCAACAATTATTGAA<br/> GTTTCAGACACTTGATCATCTCCCAAGTTGATACCTCCTTCAACAAGTT<br/> ATACGAATTGTGCAAGAACTCCGAAGATAATCAAGGTATGGTTAGAA<br/> TGGATGATTGGTTGGCTCAATTGTCTTCTCAGTTATTGGTAGAATC<br/> GTTTGCAGTTTCCAATCTGATCCAAAACTGGTGTCCATCTAGAGT<br/> CGAACAATTCAAAGAAGCTATTAACGAAGCCTCCTACTTCATGTCTA<br/> CTTCTCCAGTTTCTGATAACGTTCCAATGTTGGGTTGGATCGATCAAT<br/> TGACTGGTTTACTAGAAACATGACCCATTGTGGTAAGAAGTTGGAT<br/> TTGGTTGTGCAATCCATCATCAACGATCACAGACAAAAGAGAAGATT<br/> CTCCAGAACAAAAGGTGGTGACGAAAAGGATGATGAACAAGATGAT<br/> TTCATCGACATCTGCTTGTCCATTATGGAACAACCACAATTGCCAGG<br/> TAACAACAATCCACCAAAAATCCCAATCAAGTCCATCGTTTTGGATAT<br/> GATTGGTGCTGGTACTGATACCACTAAGTTGACTATTATTTGGACCTT<br/> GTCCTTGTGTTGAACAACCCAAATGTTTTGGCTAAGGCCAAACAAG<br/> AAGTTGACGCTCATTTTGAACATAAGAAGAGATCTACCAACGAAGCT<br/> TCTGTCTGTTGTTGATTTTCGATGATATTGGTAACTTGGTCTACATCCAA<br/> GCCATTATCAAAGAATCCATGAGATTATACCCAGTCTCCCCAGTTGT<br/> TGAAAGATTGTCATCTGAAGATTGTGTTGTTGGTGGTTTTTCATGTTCC<br/> AGCTGGTACTAGATTGTGGGCTAATGTTTGGAAAATGCAAAGAGATC<br/> CAAAGGTTTGGGATGACCCTTTGGTTTTAGACCAGAAAGATTCTTG<br/> TCCGACGAACAAAATGTTGATGTTAGAGGTCAAATTACGAATT</p> |



|                   |                                                                                                                                                                                                                                                                                                                                                                                                                                                                                                                                                                                                                                                                                                                                                                                                                                                                                                                                                                                                                                                                                                                                                                                                                                                                                                                                                                                                                                                                                                                                                                                                                                                                                                                                                                                                                                                                                                                       |
|-------------------|-----------------------------------------------------------------------------------------------------------------------------------------------------------------------------------------------------------------------------------------------------------------------------------------------------------------------------------------------------------------------------------------------------------------------------------------------------------------------------------------------------------------------------------------------------------------------------------------------------------------------------------------------------------------------------------------------------------------------------------------------------------------------------------------------------------------------------------------------------------------------------------------------------------------------------------------------------------------------------------------------------------------------------------------------------------------------------------------------------------------------------------------------------------------------------------------------------------------------------------------------------------------------------------------------------------------------------------------------------------------------------------------------------------------------------------------------------------------------------------------------------------------------------------------------------------------------------------------------------------------------------------------------------------------------------------------------------------------------------------------------------------------------------------------------------------------------------------------------------------------------------------------------------------------------|
|                   | <p>ATTGCCATTTGGTGCCGGTAGAAGAATTTGTCCAGGTGTTTCTTTCT<br/> CCTTGGATTTGATGCAATTGGTCTTGACCAGATTGATCTTGGAAATTC<br/> GAAATGAAgTCTCCATCCGgTAAGGTTGATATGACTGCTACTCCAGG<br/> TTTGATGTCTTACAAAGTTGTTCCATTGGACATCTTGTTGACCCATAG<br/> AAGAATCAAGTCTTGCGTTCAATTGGCCTCTTCTGAAAGAGAT</p>                                                                                                                                                                                                                                                                                                                                                                                                                                                                                                                                                                                                                                                                                                                                                                                                                                                                                                                                                                                                                                                                                                                                                                                                                                                                                                                                                                                                                                                                                                                                                                                                                                              |
| <i>PbREPI DRS</i> | <p>ATGGAECTACAATATTTCTCTTACTTCCAGCCACTAGTAGTGTGTT<br/> GCTCTACTACTGGCTCTTGTTTCCATTTTGTGTTAGCGTAGTGGTTCTG<br/> CGTAAGACGTTCTCCAACAATTATTCAAGTCCAGCCAGTTCCACCGA<br/> GACTGCGGTATTATGCCACCAACGTCAGCAAAGCTGCGCCTTACCG<br/> ATTAGTGGCTTGTTGCACGTCCTCATGAATAAAAACGGACTAATACA<br/> CGTAACCTTAGGCAACATGGCGGATAAGTATGGTCCGATATTTTCAT<br/> TCCAACGGGTAGCCACAGGACACTGGTGGTTTCTCTTGGGAAAT<br/> GGTCAAAGAATGTTTTACAGGAAATAACGACACCGCTTTCAGTAATA<br/> GGCCAATCCCTCTAGCATTTTCAGACGATTTTTTATGCGTGCGGCGGC<br/> ATTGACTCATACGGCTTGAGCAGCGTCCCCTACGGAAAAGTATTGGC<br/> GTGAACTACGTAAAGTTTGTGTGCACAATCTATTAAGCAATCAACAG<br/> CTATTGAAATTTAGGCATTTGATAATTTACAAGTGGACACGTCTTTC<br/> AACAAATTATACGAAGTGTGTAACAAACAGTGAGGACAATCAGGGGAT<br/> GGTCAGAATGGATGACTGGCTAGCACAACTGTCTTTAATGTCATTG<br/> GGAGAATCGTGTGCGGGTTTCAATCCGACCCGAAAACGGGCGCACC<br/> CAGTAGGGTCGAGCAGTTCAAGGAAGTAATAAATGAGGCCTCCTAC<br/> TTTATGTCCACGTCCCCTGTGAGCGACAATGTGCCCATGCTTGGCTG<br/> GATCGACCAACTGACGGGCTGACAAGAAATATGAAACATTGCGGA<br/> AAGAACTGGACCTGGTAGTAGAGTCTATCATAAAGGATCACCGTCA<br/> GAAGCGTAGATTTAGCAGAACCAAAGGCGGCGACGAGAAAGACGAC<br/> GAGCAGGATGATTTTCATTGACATATGTTTGAGCATTATGGAACAGCC<br/> GCAGTTACCCGGAATAATCCCCTCCCCAAATCCCAATAAAGAGCA<br/> TAGTTTTAGACATGATTGGCGGTGGAACGGATACTACTAAGCTGACC<br/> ACCATATGGACACTAAGTTTGTGCTAAATAACCCCATGTCTTAGAT<br/> AAGGCTAAACAAGAGGTGGATGCCCATTTTAGAAAAAAGAAGGTC<br/> CACCGACGATGCCGCCGCTGCAGTGGTTGATTTTATGACATCCGT<br/> AACTTAGTTTACATCCAGGCGATCATCAAGGAATCAATGAGGCTGTA<br/> TCCTGCTTCTCCAGTAGTTGAGAGGTTAAGCGGAGAGGACTGCGTA<br/> GTTGGTGGATTTACGCTGCCCGCAGGGACGCGTTTATGGGCCAACG<br/> TTTGGAAAATGCAGAGGGACCCGAAAGTGTGGGACGATCCATTAGT<br/> TTTTAGGCCGGAAGATTCTTATCTGATGAGCAGAAAATGGTAGACG<br/> TGCGTGGACAGAATTACGAGCTTTTGCCCTTTGGAGCAGGCAGGAG<br/> GATTTGCCCGGGGTGTCATTAGCTTAGATTTGATGCAACTGGTTC<br/> TAACACGTCTAATACTTGAATTTGAAATGAAGAGTCTTCCGGAAAG<br/> GTAGACATGACAGCGACCCCGGTCTAATGTCTACAAAGTCGTTCC<br/> CTTAGAT</p> |
| <i>PbDRR V1</i>   | <p>TGTCTTACAAAGTTGTTCCATTGGACATCTTGTTGACCCATAGAAGAA<br/> TCAAGTCTTGCGTTCAATTGGCCTCTTCTGAAAGAGATATGGAATCTT<br/> CTGGTGTCCAGTTATCACTTTGAGATCTGGTAAAGTTATGCCAGTTT<br/> TGGGTATGGGTACTTTTTGAAAAGCTGGTAAGGGTTCCGAAAGAGAA<br/> AGATTGGCTATTTTGAAGGCCATCGAAGTTGGTTACAGATACTTTGA<br/> TACTGCTGCTGCTTACGAAACCGAAGAAGTTTTAGGTGAAGCTATTG<br/> CTGAAGCCTTGCAATTGGGTTTAATCAAGTCAAGAGATGAATTATTCA<br/> TTTCCCTCATGTTGTGGTGTACTGATGCTCATCCAGATAGAGTTTTGT<br/> TGGCATTGCAAACTCATTGAGAACTTGAAGTTGGAATACGTCGAC<br/> TTGTACATGTTGCCATTTCCAGCTTTCATTGAAGCCAGGTAAGATTAC<br/> CATGGATATCCCAGAAGAAGATATCTGCCCAATGGATTATAGATCTG<br/> TTTGGTCTGCTATGGAAGAATGCCAAAATTTGGGTTTGACCAAGTCC<br/> ATTGGTGTCTCTAATTTCTCCTGCAAAAAGTTGGAAGAATTGATGGCT<br/> ACTGCTAACATTCCACCAGCTGTAATCAAGTTGAAATGTCTCCAGC<br/> TTTCCAACAAAAGAAGTTGAGAGAATACTGCAACGCTAACACATTTT</p>                                                                                                                                                                                                                                                                                                                                                                                                                                                                                                                                                                                                                                                                                                                                                                                                                                                                                                                                                                                                                                                                                       |

|                                 |                                                                                                                                                                                                                                                                                                                                                                                                                                                                                                                                                                                                                                                                                                                                                                                                                                                                                                                                                                                                                                                                                     |
|---------------------------------|-------------------------------------------------------------------------------------------------------------------------------------------------------------------------------------------------------------------------------------------------------------------------------------------------------------------------------------------------------------------------------------------------------------------------------------------------------------------------------------------------------------------------------------------------------------------------------------------------------------------------------------------------------------------------------------------------------------------------------------------------------------------------------------------------------------------------------------------------------------------------------------------------------------------------------------------------------------------------------------------------------------------------------------------------------------------------------------|
|                                 | GGTTTCCGCCGTTTCTATTTTGGGTTCTAATGGTACTCCATGGGGTT<br>CAAATGCTGTTTTAGGTTCTGAAGTCTTGAAAAAGATTGCTATGGCC<br>AAGGGTAAATCCGTTGCTCAAGTTTCAATGAGATGGGTTTATGAACA<br>AGGTGCTTCCTTGGTTGTTAAGTCCTTTAGTGAAGAAAGATTAAGAG<br>AAAAC TTGAACATCTTCGACTGGCAATTGACCAAAGAAGATAACGAA<br>AAGATCGGTGAAATCCCACAATGCAGAATTTTGTCTGCTTACTTCTTG<br>GTTAGTCCAAAGGGTCCATTCAAGTCTCAAGAAGAATTATGGGATGA<br>TAAGGCTTAA                                                                                                                                                                                                                                                                                                                                                                                                                                                                                                                                                                                                                                                                                                   |
| <i>PbDRR V2</i>                 | ATGGAATCTTCTGGTGTTCAGTTATCACTTTGAGATCTGGTAAAGTT<br>ATGCCAGTTTTGGGTATGGGTACTTTTGAAAAAGCTGGTAAGGGTTC<br>CGAAAGAGAAAGATTGGCTATTTTGAAGGCCATCGAAGTTGGTTACA<br>GATACTTTGATACTGCTGCTGCTTACGAAACCGAAGAAGTTTTAGGT<br>GAAGCTATTGCTGAAGCCTTGCAATTGGGTTTAAATCAAGTCAAGAGA<br>TGAATTATTCATTTCCCTCCATGTTGTGGTGTACTGATGCTCATCCAGA<br>TAGAGTTTTGTTGGCATTGCAAACTCATTGAGAACTTGAAGTTGG<br>AATACGTCGACTTGTACATGTTGCCATTTCCAGCTTCATTGAAGCCA<br>GGTAAGATTACCATGGATATCCCAGAAGAAGATATCTGCCCAATGGA<br>TTATAGATCTGTTTGGTCTGCTATGGAAGAATGCCAAAATTTGGGTTT<br>GACCAAGTCCATTGGTGTCTCTAATTTCTCCTGCAAAAATTTGGAAG<br>AATTGATGGCTACTGTAACTTCCACCAGCTGTAAATCAAGTTGAA<br>ATGTCTCCAGCTTTCCAACAAAAGAAGTTGAGAGAATACTGCAACGC<br>TAACAACATTTTGGTTTCCGCCGTTTCTATTTTGGGTTCTAATGGTAC<br>TCCATGGGGTTCAAATGCTGTTTTAGGTTCTGAAGTCTGAAAAAGA<br>TTGCTATGGCCAAGGGTAAATCCGTTGCTCAAGTTTCAATGAGATGG<br>GTTTATGAACAAGGTGCTTCCCTTGGTTGTTAAGTCTTTAGTGAAGAA<br>AGATTAAGAGAAAAC TTGAACATCTTCGACTGGCAATTGACCAAAGA<br>AGATAACGAAAAGATCGGTGAAATCCCACAATGCAGAATTTTGTCTG<br>CTTACTTCTTGGTTAGTCCAAAGGGTCCATTCAAGTCTCAAGAAGAA<br>TTATGGGATGATAAGGCTTAA |
| <i>PbDRR V3</i>                 | ATGGGTACTTTTTGAAAAAGCTGGTAAGGGTCCGAAAGAGAAAGATT<br>GGCTATTTTGAAGGCCATCGAAGTTGGTTACAGATACTTTGATACTG<br>CTGCTGCTTACGAAACCGAAGAAGTTTTAGGTGAAGCTATTGCTGAA<br>GCCTTGCAATTGGGTTTAAATCAAGTCAAGAGATGAATTATTCATTTCC<br>TCCATGTTGTGGTGTACTGATGCTCATCCAGATAGAGTTTTGTTGGC<br>ATTGCAAACTCATTGAGAACTTGAAGTTGGAATACGTCGACTTGT<br>ACATGTTGCCATTTCCAGCTTCATTGAAGCCAGGTAAGATTACCATG<br>GATATCCCAGAAGAAGATATCTGCCCAATGGATTATAGATCTGTTT<br>GTCTGCTATGGAAGAATGCCAAAATTTGGGTTTGACCAAGTCCATTG<br>GTGTCTCTAATTTCTCCTGCAAAAAGTTGGAAGAATTGATGGCTACT<br>GCTAACATTCCACCAGCTGTAATCAAGTTGAAATGTCTCCAGCTTT<br>CCAACAAAAGAAGTTGAGAGAATACTGCAACGCTAACAAACATTTTGG<br>TTTCCGCCGTTTCTATTTTGGGTTCTAATGGTACTCCATGGGGTTCAA<br>ATGCTGTTTTAGGTTCTGAAGTCTTGAAAAAGATTGCTATGGCCAAG<br>GGTAAATCCGTTGCTCAAGTTTCAATGAGATGGGTTTATGAACAAGG<br>TGCTTCTTGGTTGTTAAGTCTTTAGTGAAGAAAGATTAAGAGAAAA<br>CTTGAACATCTTCGACTGGCAATTGACCAAAGAAGATAACGAAAAGA<br>TCGGTGAATCCCACAATGCAGAATTTTGTCTGCTTACTTCTTGGTTA<br>GTCCAAAGGGTCCATTCAAGTCTCAAGAAGAATTATGGGATGATAAG<br>GCTTAA                                                                      |
| <i>PrDRS-PbDRR V2 chimera 1</i> | ATGGAGTACAGCGATTTACAATTGTTTGGTTTTCCAGCCCACAAGCGT<br>CGTAGCATTATTGCTGGCGTTGGTCTCCATTTTGTAGGCGTCATTG<br>CGGTGTCACACCACAGGGCGAAGCCTTCTTGTGCTCTGCCCATGAT<br>CGGTTTATACCACGTTTTTATGAATAAGACAGGTTTAAATTCATGTAAC<br>ACTTGGGAACATGGCAGATAAGTACGGGCCCATCTTCAGCTTCCCA<br>ACGGGAGGCCACAGAGCCCTGGTTGTCTCCTCTTGGGAAATGGCCA<br>AGGAATGTTTACAGGTGACAACGATATCGTCTTCAGTAACCGTCCT                                                                                                                                                                                                                                                                                                                                                                                                                                                                                                                                                                                                                                                                                                                     |

|                                             |                                                                                                                                                                                                                                                                                                                                                                                                                                                                                                                                                                                                                                                                                                                                                                                                                                                                                                                                                                                                                                                                                                                                                                                                                                                                                                                                                                                                                                                                                                                                                                                                                                                                                                                                                                                                                                                                                                                                                                                                                                                                                                                                                                                                                                                                                                                                                                                                                                                                                                                                                                                                                                                                         |
|---------------------------------------------|-------------------------------------------------------------------------------------------------------------------------------------------------------------------------------------------------------------------------------------------------------------------------------------------------------------------------------------------------------------------------------------------------------------------------------------------------------------------------------------------------------------------------------------------------------------------------------------------------------------------------------------------------------------------------------------------------------------------------------------------------------------------------------------------------------------------------------------------------------------------------------------------------------------------------------------------------------------------------------------------------------------------------------------------------------------------------------------------------------------------------------------------------------------------------------------------------------------------------------------------------------------------------------------------------------------------------------------------------------------------------------------------------------------------------------------------------------------------------------------------------------------------------------------------------------------------------------------------------------------------------------------------------------------------------------------------------------------------------------------------------------------------------------------------------------------------------------------------------------------------------------------------------------------------------------------------------------------------------------------------------------------------------------------------------------------------------------------------------------------------------------------------------------------------------------------------------------------------------------------------------------------------------------------------------------------------------------------------------------------------------------------------------------------------------------------------------------------------------------------------------------------------------------------------------------------------------------------------------------------------------------------------------------------------------|
|                                             | <p>ATGCCGCTATCCTTCAAGATAATATTCAACGCGGGTGGTATAGATTC<br/> CGCCGGACTGACCCAAGTTCCCTTATGGGAAGTATTGGCGTGAGTTG<br/> AGGAAGATTTGCGTCCACAACCTTTTGAGTAATCAGCAGTTACTTAA<br/> ATTCCGTCACTTAATAAACTCTCAGGTTGACACATCCTTTACAAA<br/> ACTATACGAGTCTTGTAACAAGGGGAATAGTGGCATGGTGAGGATGGAC<br/> GACTGGTTAGGAGAATTGTCATTCAACGTAATAGGACGTATAGTCTG<br/> CGGCTTTAGGAGCGATACTGAAACCTCTGCGACAAGTAGTGCGGAA<br/> AGGTTACGGTAGCAATCGATGAAGCAAGTCGTTTTATGTCCATACC<br/> AGCGGTCTCTGATACCTTCCCTTGGCTTGGTTGGATTGATCGTCTTA<br/> CTGGTTTAATCAAGGACATGAAACACCACGCGGAAAAATTAGACCTA<br/> GTTGTGGAGTCCATTATAGAGGACCACAGGCAAAAGAGACGTTTCTC<br/> TCGTACGAAGAAGGGAGACGAGAATAACACAGAAGACGAGCAGGAT<br/> GATTTCATAGACATATGTTTGTCCATCATGGAGCAACCAGAGTTACC<br/> GGGGAACAACATGACACGTCAAATGCCTATTAAGAGTATCATTGTTG<br/> ATATGATTGGCGGTGCCACTGACACGACAAAACACTGACAACGATATG<br/> GACACTATCCTTATTGCTGAATAACCCCCACGTATTAGGAAAAGCAA<br/> AGGAGGAGGTAGATGCGCATTTTGGAAAGAAGCGTAGCAGCAGAA<br/> CGGTGAAGTAATGGTTGATTTGACGATATCAGAAGCTTAGTGATACA<br/> TTCAGGCTATAATAAAGGAAAGCATGAGATTATATCCCGCTTCTCCA<br/> GTTGTGAAAGGTTGAGCAGTGAAGACTGCGTAGTCGGCGGCTTTC<br/> ACGTCAGTGCCGGAACGAGGCTATGGGTGAATGTGTGGAAGGTGCA<br/> ACGTGATCCTGAAGTTTGGGATGACCCTAGTGTATTCCGTCCAGAGA<br/> GATTCCTGAGTAACGAGCAAAAGATGGTAGATGTCAGGGGGCAGGA<br/> TTACGAGCTACTTCTTTTGGAGCTGGACGTCGTATTTGTCTGGCG<br/> TATCCTTTAGCTTGGATTTGATGCATCTAGTCTTAACCAGGTTGATCC<br/> TGGAGTTTGAATCAAATCCCCGGTGGAGAGGTTGACATGACTGC<br/> AACGCAGGGGCTTATGTCTTACAAGGTCGTGCCATTGGACATCCTG<br/> CTAACAAGAAGAATGTTGAAGTCTTGCCTTCAATTGGCCTCTTCTGA<br/> AAGAGATATGGAATCTTCTGGTGTTCAGTTATCACTTTGAGATCTG<br/> GTAAAGTTATGCCAGTTTTGGGTATGGGTACTTTTGA AAAAGCTGGT<br/> AAGGTTCCGAAAGAGAAAGATTGGCTATTTTGAAGGCCATCGAAGT<br/> TGGTTACAGATACTTTGATACTGCTGCTGCTTACGAAACCGAAGAAG<br/> TTTTAGGTGAAGCTATTGCTGAAGCCTTGCAATTGGGTTTAATCAAGT<br/> CAAGAGATGAATTATTCATTTCTCCATGTTGTGGTGTACTGATGCTC<br/> ATCCAGATAGAGTTTTGTTGGCATTGCAAACTCATTGAGAACTTGA<br/> AGTTGGAATACGTCGACTTGTACATGTTGCCATTTCCAGCTTCATTG<br/> AAGCCAGGTAAGATTACCATGGATATCCCAGAAGAAGATATCTGCC<br/> AATGGATTATAGATCTGTTTGGTCTGCTATGGAAGAATGCCAAAATTT<br/> GGGTTTGACCAAGTCCATTGGTGTCTCTAATTTCTCTGCAAAAAGT<br/> TGGAAGAATTGATGGCTACTGCTAACATTCCACCAGCTGTAAATCAA<br/> GTTGAAATGTCTCCAGCTTTCCAACAAAAGAAGTTGAGAGAATACTG<br/> CAACGCTAACAAACATTTTGGTTTCCGCCGTTTTCTATTTTGGGTTCTAA<br/> TGGTACTCCATGGGGTTCAAATGCTGTTTTAGGTTCTGAAGCTTGA<br/> AAAAGATTGCTATGGCCAAGGGTAAATCCGTTGCTCAAGTTTCAATG<br/> AGATGGGTTTATGAACAAGGTGCTTCCCTTGGTTGTTAAGTCCTTTAG<br/> TGAAGAAAGATTAAGAGAAAACCTTGAACATCTTCGACTGGCAATTGA<br/> CCAAAGAAGATAACGAAAAGATCGGTGAAATCCCACAATGCAGAATT<br/> TTGTCTGCTTACTTCTTGGTTAGTCCAAGGGTCCATTCAAGTCTCAA<br/> GAAGAATTATGGGATGATAAGGCTTAA</p> |
| <p><i>PrDRS-PbDRR V2<br/> chimera 2</i></p> | <p>ATGGAGTACAGCGATTTACAATTGTTTGGTTTCCAGCCCACAAGCGT<br/> CGTAGCATTATTGCTGGCGTTGGTCTCCATTTTGTAGGCGTCATTG<br/> CGGTGTCACACCACAGGGCGAAGCCTTCTTGTGCTCTGCCATGAT<br/> CGGTTTATACCACGTTTTTATGAATAAGACAGGTTTAATTCATGTAAC<br/> ACTTGGGAACATGGCAGATAAGTACGGGCCCATCTTCAGCTTCCCA<br/> ACGGGAGGCCACAGAGCCCTGGTTGTCTCCTCTTGGGAAATGGCCA<br/> AGGAATGTTTACAGGTGACAACGATATCGTCTTCAGTAACCGTCTCCT</p>                                                                                                                                                                                                                                                                                                                                                                                                                                                                                                                                                                                                                                                                                                                                                                                                                                                                                                                                                                                                                                                                                                                                                                                                                                                                                                                                                                                                                                                                                                                                                                                                                                                                                                                                                                                                                                                                                                                                                                                                                                                                                                                                                                                                                                                                                       |

|                                             |                                                                                                                                                                                                                                                                                                                                                                                                                                                                                                                                                                                                                                                                                                                                                                                                                                                                                                                                                                                                                                                                                                                                                                                                                                                                                                                                                                                                                                                                                                                                                                                                                                                                                                                                                                                                                                                                                                                                                                                                                                                                                                                                                                                                                                                                                                                                                                                                                                                                                                                                                                                                                                  |
|---------------------------------------------|----------------------------------------------------------------------------------------------------------------------------------------------------------------------------------------------------------------------------------------------------------------------------------------------------------------------------------------------------------------------------------------------------------------------------------------------------------------------------------------------------------------------------------------------------------------------------------------------------------------------------------------------------------------------------------------------------------------------------------------------------------------------------------------------------------------------------------------------------------------------------------------------------------------------------------------------------------------------------------------------------------------------------------------------------------------------------------------------------------------------------------------------------------------------------------------------------------------------------------------------------------------------------------------------------------------------------------------------------------------------------------------------------------------------------------------------------------------------------------------------------------------------------------------------------------------------------------------------------------------------------------------------------------------------------------------------------------------------------------------------------------------------------------------------------------------------------------------------------------------------------------------------------------------------------------------------------------------------------------------------------------------------------------------------------------------------------------------------------------------------------------------------------------------------------------------------------------------------------------------------------------------------------------------------------------------------------------------------------------------------------------------------------------------------------------------------------------------------------------------------------------------------------------------------------------------------------------------------------------------------------------|
|                                             | <p>ATGCCGCTATCCTTCAAGATAATATTCAACGCGGGTGGTATAGATTC<br/> CGCCGGACTGACCCAAGTTCCCTTATGGGAAGTATTGGCGTGAGTTG<br/> AGGAAGATTTGCGTCCACAACCTTTTGAGTAATCAGCAGTTACTTAA<br/> ATTCCGTCACTTAATAAACTCTCAGGTTGACACATCCTTTACAAA<br/> ACTATACGAGTCTTGTAACAAGGGGAATAGTGGCATGGTGAGGATGGAC<br/> GACTGGTTAGGAGAATTGTCATTCAACGTAATAGGACGTATAGTCTG<br/> CGGCTTTAGGAGCGATACTGAAACCTCTGCGACAAGTAGTGCGGAA<br/> AGGTTACGGTAGCAATCGATGAAGCAAGTCGTTTTATGTCCATACC<br/> AGCGGTCTCTGATACCTTCCCTTGGCTTGGTTGGATTGATCGTCTTA<br/> CTGGTTTAAATCAAGGACATGAAACACCACGCGGAAAAATTAGACCTA<br/> GTTGTGGAGTCCATTATAGAGGACCACAGGCAAAAGAGACGTTTCTC<br/> TCGTACGAAGAAGGGAGACGAGAATAACACAGAAGACGAGCAGGAT<br/> GATTTCATAGACATATGTTTGTCCATCATGGAGCAACCAGAGTTACC<br/> GGGGAACAACATGACACGTCAAATGCCTATTAAGAGTATCATTGTTG<br/> ATATGATTGGCGGTGCCACTGACACGACAAAACACTGACAACGATATG<br/> GACACTATCCTTATTGCTGAATAACCCCCACGTATTAGGAAAAGCAA<br/> AGGAGGAGGTAGATGCGCATTTTGGAAAGAAGCGTAGCAGTACGTA<br/> CGGTGAAGTAATGGTTGATTTGACGATATCAGAAGCTTAGTGTACA<br/> TTCAGGCTATAATAAAGGAAAGCATGAGATTATATCCCGCTTCTCCA<br/> GTTGTGAAAGGTTGAGCAGTGAAGACTGCGTAGTCGGCGGCTTTC<br/> ACGTCAGTGCCGGAACGAGGCTATGGGTGAATGTGTGGAAGGTGCA<br/> ACGTGATCCTGAAGTTTGGGATGACCCTAGTGTATTCCGTCCAGAGA<br/> GATTCCTGAGTAACGAGCAAAAGATGGTAGATGTCAGGGGGCAGGA<br/> TTACGAGCTACTTCTTTTGGAGCTGGACGTCGTATTTGTCTGGCG<br/> TATCCTTTAGCTTGGATTTGATGCATCTAGTCTTAACCAGGTTGATCC<br/> TGGAGTTTGAATCAAATCCCCGGTGGAGAGGTTGACATGACTGC<br/> AACGCAGGGGCTTATGTCTTACAAGGTCGTGCCATTGGACATCCTG<br/> CTAACAAGAAGAATGTTGATGGAATCTTCTGGTGTCCAGTTATCACT<br/> TTGAGATCTGGTAAAGTTATGCCAGTTTTGGGTATGGGTACTTTTGA<br/> AAAAGCTGGTAAGGGTTCCGAAAGAGAAAGATTGGCTATTTTGAAGG<br/> CCATCGAAGTTGGTTACAGATACTTTGATACTGCTGCTGCTTACGAA<br/> ACCGAAGAAGTTTTAGGTGAAGCTATTGCTGAAGCCTTGCAATTGGG<br/> TTAATCAAGTCAAGAGATGAATTATTCATTTCTCCATGTTGTGGTG<br/> TACTGATGCTCATCCAGATAGAGTTTTGTTGGCATTGCAAAACTCATT<br/> GAGAACTTGAAGTTGGAATACGTCGACTTGTACATGTTGCCATTTCC<br/> CAGCTTCATTGAAGCCAGGTAAGATTACCATGGATATCCCAGAAGAA<br/> GATATCTGCCCAATGGATTATAGATCTGTTTGGTCTGCTATGGAAGA<br/> ATGCCAAAATTTGGGTTTGACCAAGTCCATTGGTGTCTCTAATTTCTC<br/> CTGCAAAAAGTTGGAAGAATTGATGGCTACTGCTAACATTCCACCAG<br/> CTGTAAATCAAGTTGAAATGTCTCCAGCTTTCCAACAAAAGAAGTTGA<br/> GAGAATACTGCAACGCTAACAACATTTTGGTTTCCGCCGTTTCTATTT<br/> TGGGTTCTAATGGTACTCCATGGGGTTCAAATGCTGTTTTAGGTTCT<br/> GAAGTCTTGA AAAAGATTGCTATGGCCAAGGGTAAATCCGTTGCTCA<br/> AGTTTCAATGAGATGGGTTTATGAACAAGGTGCTTCCTTGGTTGTTA<br/> AGTCCTTTAGTGAAGAAAGATTAAGAGAAAACCTTGAACATCTTCGACT<br/> GGCAATTGACCAAGAAGATAACGAAAAGATCGGTGAAATCCCACAA<br/> TGCAGAATTTTGTCTGCTTACTTCTTGGTTAGTCCAAAGGGTCCATTC<br/> AAGTCTCAAGAAGAATTATGGGATGATAAGGCTTAA</p> |
| <p><i>PrDRS-PbDRR V2<br/> chimera 3</i></p> | <p>ATGGAGTACAGCGATTTACAATTGTTTGGTTTCCAGCCCACAAGCGT<br/> CGTAGCATTATTGCTGGCGTTGGTCTCCATTTTGTAGGCGTCATTG<br/> CGGTGTCACACCACAGGGCGAAGCCTTCTTGTGCTCTGCCATGAT<br/> CGGTTTATACCACGTTTTTATGAATAAGACAGGTTTAATTCATGTAAC<br/> ACTTGGGAACATGGCAGATAAGTACGGGCCCATCTTCAGCTTCCCA<br/> ACGGGAGGCCACAGAGCCCTGGTTGTCTCCTCTTGGGAAATGGCCA<br/> AGGAATGTTTACAGGTGACAACGATATCGTCTTCAGTAACCGTCCT<br/> ATGCCGCTATCCTTCAAGATAATATTCAACGCGGGTGGTATAGATTC</p>                                                                                                                                                                                                                                                                                                                                                                                                                                                                                                                                                                                                                                                                                                                                                                                                                                                                                                                                                                                                                                                                                                                                                                                                                                                                                                                                                                                                                                                                                                                                                                                                                                                                                                                                                                                                                                                                                                                                                                                                                                                                                                                                                                                             |

|           |                                                                                                                                                                                                                                                                                                                                                                                                                                                                                                                                                                                                                                                                                                                                                                                                                                                                                                                                                                                                                                                                                                                                                                                                                                                                                                                                                                                                                                                                                                                                                                                                                                                                                                                                                                                                                                                                                                                                                                                                                                                                                                                                                                                                                                                                                                                                                                                                                                                                                                                                                                                                                                                         |
|-----------|---------------------------------------------------------------------------------------------------------------------------------------------------------------------------------------------------------------------------------------------------------------------------------------------------------------------------------------------------------------------------------------------------------------------------------------------------------------------------------------------------------------------------------------------------------------------------------------------------------------------------------------------------------------------------------------------------------------------------------------------------------------------------------------------------------------------------------------------------------------------------------------------------------------------------------------------------------------------------------------------------------------------------------------------------------------------------------------------------------------------------------------------------------------------------------------------------------------------------------------------------------------------------------------------------------------------------------------------------------------------------------------------------------------------------------------------------------------------------------------------------------------------------------------------------------------------------------------------------------------------------------------------------------------------------------------------------------------------------------------------------------------------------------------------------------------------------------------------------------------------------------------------------------------------------------------------------------------------------------------------------------------------------------------------------------------------------------------------------------------------------------------------------------------------------------------------------------------------------------------------------------------------------------------------------------------------------------------------------------------------------------------------------------------------------------------------------------------------------------------------------------------------------------------------------------------------------------------------------------------------------------------------------------|
|           | <p>CGCCGGACTGACCCAAGTTCCTTATGGGAAGTATTGGCGTGAGTTG<br/> AGGAAGATTTGCGTCCACAACCTTTTGAGTAATCAGCAGTTACTTAA<br/> ATTCCGTCACTTAATAAACTCTCAGGTTGACACATCCTTTACAAA<br/> ACTATACGAGTCTTGTAACAAGGGGAATAGTGGCATGGTGAGGATGGAC<br/> GACTGGTTAGGAGAATTGTCATTCAACGTAATAGGACGTATAGTCTG<br/> CGGCTTTAGGAGCGATACTGAAACCTCTGCGACAAGTAGTGCGGAA<br/> AGGTTACGGTAGCAATCGATGAAGCAAGTCGTTTTATGTCCATACC<br/> AGCGGTCTCTGATACCTTCCCTTGGCTTGGTTGGATTGATCGTCTTA<br/> CTGGTTTAATCAAGGACATGAAACACCACGCGGAAAAATTAGACCTA<br/> GTTGTGGAGTCCATTATAGAGGACCACAGGCAAAAGAGACGTTTCTC<br/> TCGTACGAAGAAGGGAGACGAGAATAACACAGAAGACGAGCAGGAT<br/> GATTCATAGACATATGTTTGTCCATCATGGAGCAACCAGAGTTACC<br/> GGGGAACAATATGCACGTCAAATGCCTATTAAGAGTATCATTGTTG<br/> ATATGATTGGCGGTGCCACTGACACGACAAAACCTGACAACGATATG<br/> GACACTATCCTTATTGCTGAATAACCCCCACGTATTAGGAAAAGCAA<br/> AGGAGGAGGTAGATGCGCATTTTGAAAGAAGCGTAGCAGCACGAA<br/> CGGTGAAGTAATGGTTGATTCGACGATATCAGAAGCTTAGTGTACA<br/> TTCAGGCTATAATAAAGGAAAGCATGAGATTATATCCCCTTCCCA<br/> GTTGTGAAAGGTTGAGCAGTGAAGACTGCGTAGTCGGCGCTTTC<br/> ACGTGAGTCCGGAACGAGGCTATGGGTGAATGTGTGGAAGGTGCA<br/> ACGTGATCCTGAAGTTTGGGATGACCCTAGTGTATTCCGTCAGAGA<br/> GATTCCTGAGTAACGAGCAAAAGATGGTAGATGTCAGGGGGCAGGA<br/> TTACGAGCTACTTCTTTTGGAGCTGGACGTCGTATTTGTCTGGCG<br/> TATCCTTTAGCTTGGATTTGATGCATCTAGTCTTAACCAGGTTGATCC<br/> TGGAGTTTGAATCAAATCCCCGGTGGAGAGGTTGACATGACTGC<br/> AACGCAGGGGCTTATGTCTTACAAGTTCGTGCCATTGGACATCCTG<br/> CTAACAAGAAGAATGTTGTCTTACAAGTTGTTCCATTGGACATCTTG<br/> TTGACCCATAGAAGAATCAAGTCTTGCCTTCAATTGGCCTCTTCTGA<br/> AAGAGATATGGAATCTTCTGGTGTCCAGTTATCACTTTGAGATCTG<br/> GTAAAGTTATGCCAGTTTTGGGTATGGGTACTTTTGAAGGCTGGT<br/> AAGGGTTCCGAAAGAGAAAGATTGGCTATTTTGAAGGCCATCGAAGT<br/> TGGTTACAGATACTTTGATACTGCTGCTTACGAAACCGAAGAAG<br/> TTTTAGGTGAAGCTATTGCTGAAGCCTTGCAATTGGGTTTAATCAAGT<br/> CAAGAGATGAATTATTCATTTCTCCATGTTGTGGTGTACTGATGCTC<br/> ATCCAGATAGAGTTTTGTTGGCATTGCAAACTCATTGAGAACTTGA<br/> AGTTGGAATACGTCGACTTGTACATGTTGCCATTTCCAGCTTCATTG<br/> AAGCCAGGTAAGATTACCATGGATATCCCAGAAGAAGATATCTGCC<br/> AATGGATTATAGATCTGTTTGGTCTGCTATGGAAGAATGCCAAAATTT<br/> GGGTTTGACCAAGTCCATTGGTGTCTCTAATTTCTCTGCAAAAAGT<br/> TGAAGAATTGATGGCTACTGCTAACATTCCACCAGCTGTAAATCAA<br/> GTTGAAATGTCTCCAGCTTTCCAACAAAAGAAGTTGAGAGAATACTG<br/> CAACGCTAACAAACATTTTGGTTTCCGCCGTTTTCTATTTTGGGTTCTAA<br/> TGGTACTCCATGGGGTTCAAATGCTGTTTTAGGTTCTGAAGTCTTGA<br/> AAAAGATTGCTATGGCCAAGGGTAAATCCGTTGCTCAAGTTTCAATG<br/> AGATGGGTTTATGAACAAGGTGCTTCCCTTGGTTGTTAAGTCTTTAG<br/> TGAAGAAAGATTAAGAGAAAACCTGAACATCTTCGACTGGCAATTGA<br/> CCAAAGAAGATAACGAAAAGATCGGTGAAATCCCACAATGCAGAATT<br/> TTGTCTGCTTACTTCTTGGTTAGTCCAAAGGGTCCATTCAAGTCTCAA<br/> GAAGAATTATGGGATGATAAGGCTTAA</p> |
| BsCYP80A1 | <p>ATGGACTATATTGTTGGTTTCGTAAGTATTTCTTTAGTTGCTCTGCTT<br/> TACTTCTTTTGTTCAAACCTAAGCATACTAATCTACCTCCTTCTCCC<br/> CCAGCATGGCCGATAGTAGGTCATCTGCCAGACTTGATCTCTAAAAA<br/> CAGCCCACCATTCCTAGATTATATGTCTAACATCGCTCAGAAATATG<br/> GTCCGTTGATTCATTTGAAGTTCGGTCTGCACTCTAGTATTTTTGCCT<br/> CTACTAAGGAAGCAGCTATGGAGGTTCTGCAAACCTAATGACAAAGTG<br/> TTATCTGGTAGACAACCATTGCCTTGTTTTAGAATTAAGCCACATATC</p>                                                                                                                                                                                                                                                                                                                                                                                                                                                                                                                                                                                                                                                                                                                                                                                                                                                                                                                                                                                                                                                                                                                                                                                                                                                                                                                                                                                                                                                                                                                                                                                                                                                                                                                                                                                                                                                                                                                                                                                                                                                                                                                                                                                                                                                                |

|                         |                                                                                                                                                                                                                                                                                                                                                                                                                                                                                                                                                                                                                                                                                                                                                                                                                                                                                                                                                                                                                                                                                                                                                                                                                                                                                                                                                                                                                                                                                                                                                                                                                                                                                                              |
|-------------------------|--------------------------------------------------------------------------------------------------------------------------------------------------------------------------------------------------------------------------------------------------------------------------------------------------------------------------------------------------------------------------------------------------------------------------------------------------------------------------------------------------------------------------------------------------------------------------------------------------------------------------------------------------------------------------------------------------------------------------------------------------------------------------------------------------------------------------------------------------------------------------------------------------------------------------------------------------------------------------------------------------------------------------------------------------------------------------------------------------------------------------------------------------------------------------------------------------------------------------------------------------------------------------------------------------------------------------------------------------------------------------------------------------------------------------------------------------------------------------------------------------------------------------------------------------------------------------------------------------------------------------------------------------------------------------------------------------------------|
|                         | <p>GATTATAGTATCTTGTGGTCTGACTCAAACCTTTATTGGAAAAAGGT<br/> AGGAAAATCTTGCATACGGAAATTTTCTCCAGAAGATGTTGCAAGC<br/> TCAAGAAAAGAATAGAGAAAGAGTAGCTGGTAATTTGGTTAACTTCA<br/> TTATGACTAAAGTTGGTATGTTGTGCGAGTTGCGTAGTTGGTTGTTT<br/> GGCTGTGCTTTGAATGTCTTGGGTCATGTTGTTTTTTCTAAGGATGTA<br/> TTTGAATACTCCGATCAATCTGATGAGGTTGGAATGGACAAATTGAT<br/> ACACGGTATGTTGATGACCGGAGGTGATTTTGTATGTAGCTAGTTATT<br/> TCCCTGTCCTAGCCAGATTCGATCTGCATGGGCTGAAGAGAAAAATG<br/> GATGAACAGTTTAAAGTTGTTGATAAAGATTTGGGAAGGCGAAGTATT<br/> GGCACGTAGAGCGAATCGTAACCCTGAGCCAAAAGATATGTTGGAT<br/> GTCCTAATTGCGAACGACTTTAACGAACACCAGATTAACGCTATGTT<br/> TATGGAACTTTTGGTCCAGGGTCTGATACGAATAGCAACATTATAG<br/> AATGGGCTCTTGCTCAGTTGATTAAGAACCAGACAACTTGCTAAG<br/> TTGAGGGAAGAATTAGATAGAGTTGTCGGACGTTCTAGCACCGTCAA<br/> GGAATCCCATTTAGCGAACTGCCGATTTGTCAGGCTTGTGTTAAAG<br/> AGACTATGAGATTGTATCCACCCATTTCTATTATGATTCCACATAGAT<br/> GTATGGAGACTTGCCAAGTTATGGGTTATAACAATACCGAAAGGGATG<br/> GATGTGCACGTTAATGCGCAGCTATAGGCAGAGATCCCAAGGATT<br/> GGAAGGACCCACTGAAGTTTCAACCAGAACGTTTTTTGGATTCTGAC<br/> ATTGAGTATAATGGTAAGCAATTTTCAAGTTTATTCCCTTTGGAAGCGGT<br/> AGGAGAATTTGCCAGGTAGACCACTTGCTGTTAGAATAATTCCATT<br/> GGTATTAGCCTCTTTGGTTCACGCCTTCGGTTGGGAATTGCCCGATG<br/> GAGTTCCAATGAGAACTAGACATGGAGGAATTGTTACCCCTTTCT<br/> TTGTGTATGGCTAAACCGTTGAGAGTTATCCCCAAAGTGAGGATT</p>                                                                                                                                                                                                                                                                                                                                                                                         |
| <p><i>NnCYP80A1</i></p> | <p>ATGGCTTTGTTGGCCCTATTTATCCTATTCCTTTAAGCATCCTGTCA<br/> CTTGTCTATTCTTGAAACCGAGTAGTAAAAAGTTGCCCCAGGACC<br/> TTTCTCTTGCCAATTATCGGCACACAACCTGCCAGCCGACTATGA<br/> AACCTAATCTTGAACCTATTCAAACCTGGCACAAAGATACGGCCCTCTA<br/> ATGTTGTTTCGTTTCGGTTTCGAAAACGTGGTTGTAGCTTCCAATCAC<br/> GTAGCCGCAATGGAAGTCCTGAAGAACCAGGACCGTGTGCTTAGCG<br/> GCAGATTCAAAGCCAATTCAGTCAGAGTAAAAGGGTACATAGAATAT<br/> TCAATGGTATGGGCGGATTGCACAGATTATTGGAAGATGGTCCGTAA<br/> AATTCTGAGGACCGAGCTATTTTCAACAAAATGTTGGACGTCCATG<br/> CACACGTAAGGGAGGAAAAAGTTTCCGAATTGATGAAATTCTTAAGG<br/> AGAAAGGAAGGGGAGGAGGTAAATTTTCGTAGATGTTATATTTGGCTG<br/> CATCCTGAATATGCTAGGCGCTTTGATCTACTCTAAAGATGTCTATGA<br/> TTTTGAGGATAAAACCGACATAAACTTGGGTATGAAGGGGATGATAA<br/> GGCAGCTTATGATACTTGCTGCGACACCCAATATCGCTGACCTATAC<br/> CCTATCTTCTTTGACGGTTCAGACTTTCAAGGCTTGAGAAAGGAATC<br/> TGCTGCTTGCGTTAAGAGAATGAGTGAGAGCTGGGCGGCCATAATA<br/> AACGAGAGAAGGAAAAATAACGACCATACGAAGAATGATTTATTGCA<br/> GGTCTTACTGGACAGCGGTTTCTCTGATCCACAAATTGACGCTATAT<br/> TTCTAGAAACCTTCGGTCCCGGGTCTGATACTTCAGCATCTACGATT<br/> GAATGGGCTCTAGCAGAGCTTTTACGTAACCCAGAAAAACTTGTGAA<br/> ATTGCATGAGGAGTTGGATAGGGTAATCGGACGTAACAACACCGTC<br/> AAGGATAGCGACTTACCCAACCTTGCTTACCTTCATGCCTGCGTCAA<br/> GGAAACATTGAGACTGCACCCTCCAGTTCTTTTCTTATTCCGCACA<br/> TAGCGCTTGAAAGCTGTGAAGTAATGAATTATACTATACCCAAAGGG<br/> AGTGAGGTAAGTCAACCTATATGCAATCGGGCGTGACCCAACCTAC<br/> GTGGGATAACCCAACAGCTTTCTTCTGAGAGGTTCTTAATAGCG<br/> AGGTAGATTACCAAGGCAACCATTTCCAATATATACCATTTGGAGCC<br/> GGCAGAAGGATGTGCCCGGAATGAGCTTAGGGACTCGTGTTGTAA<br/> GGTTGATTTTAGCTGCCTTAGTTCATACGTTGACTGGTCCTTACCA<br/> GGAGGGATGCACCAGGATGAGTTGGACATGGCTGACCGTTTCGGA<br/> GTAGGGTTCCAGAAAGAAACGCCTCTGGTCGTTATCCCGACTCTTAG<br/> GAAGtga</p> |

|              |                                                                                                                                                                                                                                                                                                                                                                                                                                                                                                                                                                                                                                                                                                                                                                                                                                                                                                                                                                                                                                                                                                                                                                                                                                                                                                                                                                                                                                                                                                                                                            |
|--------------|------------------------------------------------------------------------------------------------------------------------------------------------------------------------------------------------------------------------------------------------------------------------------------------------------------------------------------------------------------------------------------------------------------------------------------------------------------------------------------------------------------------------------------------------------------------------------------------------------------------------------------------------------------------------------------------------------------------------------------------------------------------------------------------------------------------------------------------------------------------------------------------------------------------------------------------------------------------------------------------------------------------------------------------------------------------------------------------------------------------------------------------------------------------------------------------------------------------------------------------------------------------------------------------------------------------------------------------------------------------------------------------------------------------------------------------------------------------------------------------------------------------------------------------------------------|
| VvCYP80A1    | <p>ATGGCAACATACACGATTACGGCCGATATAAGTTTATTCTCTTTTTTG<br/> TACCCGCTTCTTTTTATTGCCCTTTCTATTAATATTTAAGCACATATTCC<br/> TAAAGAGTCCACCTTTGCCCCCGGGTCCGTACCCATGGCCTATTATA<br/> GGCAACCTGCTGCAAATGGGTGGCAACTTACATGTCAAGCTTGCGA<br/> ATTTGGCTAAGAGACATGGGCCCTAATGAGCCTTAGACTAGGAACT<br/> CAAATAATGGTAGTTGCGAGTAGTTCCGCCGCTGCTATGGAGGTTTT<br/> GAAAACCTCATGACCGTACCCTGTCAGGCAGATATAGGTTGGAAGAG<br/> TCTGAGTCTTATTTGCCAGATGGCGCAGTATTTAGACAGTCAAACGG<br/> CGTGTCTATGCGGAGTTGAAGGAGAAGAAGGAGATGGTATTGGAGGT<br/> GTCTTTGGGAAGAAGGGTAGAGATGTTAGAGGAGTGTTATTA AAAAG<br/> TCTGCTTAACGAGAATGCAGA ACTAGGTGCTACCGACATCCTAGATT<br/> TCTACCC TATTTTGGGGGGCTTAGACATACAAGGGATTGTA AAAA<br/> TTGAAAGAAATATTTAGGCGTATCCCAACGACTTGGGAAGATATATTA<br/> AAAGAACGTAGAAAGCAAAGGATACATGGAAGCTCACATGGCGATTT<br/> CCTGGATGCCCTGCTTGAGACGGGTTTTGAAGACGATCAGATCAAC<br/> CATGTTATCATGGAGCTGTTTTTTGCCGGCCCTGAAACGTCTCCCT<br/> GACCGTGGAAATGGGCAATGGCCGAGCTAATTAAGAACCAGGATGCT<br/> ATGCACAAGCTGTGAATGAATTGACTCAGATCATCGTGAAAGCCC<br/> GAGGTCCAGGGATTTAGAAGATCCTTTATCATTTAAGCCCCGAAAGAT<br/> TCTTAGATTCAAAGTTAGAGTTTAAGGGAAACGATTTGAGTACATAC<br/> CTTTCGGAGCTGGAAGACGTATGTGCCCGGTATGCCGCTGGCAGC<br/> AAGACTGGTCCCTATGATCTTAGCCACGTTTTGTGCGTCTTTTTGATT<br/> GGTCAACGCCGGGTGATATGGACTTCGCAGAGATAGACATGGAAGA<br/> ACGTTTTGTTATTACTTTGAGGAAGGAACAACCCTTAAGATTAGACTA<br/> TTGGGGATTAGTTGAAAATGGAATCCCTGCTGCGGCTGAAGGAGTC<br/> GTACTTATCGATGCGCAACGTAAAAACATCGACGATCAGAAGCTAAA<br/> AGATCTAAAAACGAAAACTACTTATTCCAGGCACTGAACAGGTCCA<br/> TCTTGGAGACTGTACTAAAAAAGACACGACAAAGAATATTTGGGAC<br/> TCTCTGAAG</p> |
| Bs-MaCYP80A1 | <p>ATGGACTATATTGTTGGTTTTCGTAAGTATTTCTTTAGTTGCTCTGCTT<br/> TACTTCCTTTTTGTTCAAACCTAAGCATACTAATCTACCTCCTTCTCCC<br/> CCAGCATGGCCGATAGTAGGTCATCTGCCAGACTTGATCTCTAAAAA<br/> CAGCCCACCATTCCCTAGATTATATGTCTAACATCGCTCAGAAATATG<br/> GTCCGTTGATTCATTTGAAGTTCCGGTCTGCACTCTAGTATTTTTGCCT<br/> CTACTAAGGAAGCAGCTATGGAGGTCTTACAGATTAACGACAAGGCT<br/> TTGAGCGGGAGACAGCCTCTTCCCTGCTTTAGGATAAAGCCCCATAT<br/> AGACTATTCTATCGTCTGGTCCGACTCTAATAGTTACTGGAAGAACG<br/> GACGTAAGATACTTCACACCGAAATATTTTCCAGAAAATGCTTCAA<br/> GCGCAGGAAAAAATAGGGAGAGGGTGGCAGAAAACCTGGTGAAC<br/> TTATCCGTACAAAAGTGGGTAAACGTTGTGCAACTAAGGAGCTGGCTA<br/> TTTGGCTGTGCGCTGAATGTATTAGGCCATGTTGTATTTTCAAAGGA<br/> TGTGTTCCGGCTACTCAGATCAATCAGACGAAGTTGGTATGGATAAGC<br/> TGATTCATGGTATGATCATGACGGGCGGAGACTTCGATGTAGCATCC<br/> TACTTCCCGTTCTTGCAAGATTTGATATACACGGTCTTAAAAGGAAA<br/> ATGGATGAACAGTTTAAATTAATAATCAAGTTTTGGGAGGGAGAAGT<br/> ATTAGCGAGGAAAGCTAACCAGAACCCTGAGCCGAAGGATATGTTA<br/> GATGTGCTAATTGCGAATGACTTTAATGAACATCAGATAAATGCTATG<br/> TTCTTAGAAACGTTCCGGTCCAGGGAGCGATACGAGCTCAGCAACAA<br/> TAGAATGGGCGTTGGCACAATTGATAAAAAACCCAGACAAGTTGGCA<br/> AACTAAGGGAAGAGCTGGACAGGGTTGTAGGAAGATCATCCACGG<br/> TGAAGGAGAGCCACTTCTCACAGTTGCCATATCTTCAGGCTTGCGTC<br/> AAAGAGACGATGAGACTGTATCCGTCCGTTACGATCATGATCCACA<br/> CCGTTGTATGGAAACGTGCCAAGTCATGGGCTATACTATTCTAAAG<br/> GTATTGATGTTTCATGTCAATGCCCATGCGATTGGCAGGGACCCTAAG<br/> GATTGGAAGACCCACTTAAGTTTTAGCCTGAGAGGTTCTTAGACTC<br/> CGATATAGAGTACAATGGGAAGCAATTCAGTTTATTCCGTTTGGTT</p>                                                                   |

|                     |                                                                                                                                                                                                                                                                                                                                                                                                                                                                                                                                                                                                                                                                                                                                                                                                                                                                                                                                                                                                                                                                                                                                                                                                                                                                                                                                                                                                                                                                                                                                                                                                                                                                                                                 |
|---------------------|-----------------------------------------------------------------------------------------------------------------------------------------------------------------------------------------------------------------------------------------------------------------------------------------------------------------------------------------------------------------------------------------------------------------------------------------------------------------------------------------------------------------------------------------------------------------------------------------------------------------------------------------------------------------------------------------------------------------------------------------------------------------------------------------------------------------------------------------------------------------------------------------------------------------------------------------------------------------------------------------------------------------------------------------------------------------------------------------------------------------------------------------------------------------------------------------------------------------------------------------------------------------------------------------------------------------------------------------------------------------------------------------------------------------------------------------------------------------------------------------------------------------------------------------------------------------------------------------------------------------------------------------------------------------------------------------------------------------|
|                     | <p>CCGGCAGAAGAATTTGCCCTGGATGGCCCCTGGCCGTTTCGTACCAT<br/> CCCCTGGTCTTAGCGTCACTGGTCCATGCATTTCGATTGGGAATTAC<br/> CTGATGGAGTTCCCAACGAAAAGCTTGACATGGAAGAATTGTTTACC<br/> CTAACTCTTTCATGGCCAAGCCATTACGTGTAATCCCCAAGGTTTCG<br/> TATA</p>                                                                                                                                                                                                                                                                                                                                                                                                                                                                                                                                                                                                                                                                                                                                                                                                                                                                                                                                                                                                                                                                                                                                                                                                                                                                                                                                                                                                                                                                                 |
| <i>Bs-XsCYP80A1</i> | <p>ATGGACTATATTGTTGGTTTTCGTAAGTATTTCTTTAGTTGCTCTGCTT<br/> TACTTCCTTTTTGTTCAAACCTAAGCATACTAATCTACCTCCTTCTCCC<br/> CCAGCATGGCCGATAGTAGGTCATCTGCCAGACTTGATCTCTAAAAA<br/> CAGCCCACCATTCTAGATTATATGTCTAACATCGCTCAGAAATATG<br/> GTCCGTTGATTCATTTGAAGTTCGGTCTGCACTCTAGTATTTTTGCCT<br/> CTACTAAGGAAGCAGCTATGGAGATCCTAAAACTAACGATAAAGTA<br/> TTATCAGGAAGGACCCCGTTGCCGTGCTTTTTAATCAAGCCTCATAT<br/> TAACTATTCCCTTGTTGGAGCGATTCAACAAGTTATTGGAAATCACT<br/> GAGAAAAATACTACACACGGAGATATTTGCTCAAAAAATGTTACTAG<br/> ATCAAGAAAAAACCGTGAGAGGATGGTCCGGGATTTAGTTAACTTC<br/> TTCCGTGCAAAAGTAGGGGACGTTGTTGAATTGAAAAGCTGGCTGTT<br/> TGGGTTCTCATTAAACGTGCTTTCTAACGCGATATTTAGCAAGGACG<br/> TTTTCCGCTATTACAGACAACGGGGGCAAAGTTGGTATGGACAAAATA<br/> ATTCAGGAGATGTTTAAAGTTCGGGGGGGAATTTGACGCCGCAAGTT<br/> ATTTCTCCTGCCTAGAAAGTTTCGATCTGCACGGCTTGCCTCGTAAA<br/> ATGAATGAATTGTTCCAATTAGCAATTAACCTTTGGGAAGGAGAAGTT<br/> ATTATGCGTAAGGCCAACCGTAATGCGGAGCCAAAAGATATGTTAGA<br/> TGTGCTTATTGCGAATGATTTAACGATCATCAGATTAACGCGATATT<br/> TGTGGAGACATTCAGTGCAGGGTCAGAACTTCCAGTAGCACGGTT<br/> GAATGGGCCCTAGCCGAATTAATCAAATCACCGGATAAGATGGCCA<br/> AACTGAGGGAAGAAGTACAGGGTTCGTAGGGAGGTCCTTTACCAT<br/> GAAGGAATCTCATATTTCTCAATTGCCCTACCTGCAAGCATGCATTA<br/> AGAAACCATGAGGTTACACCCTGCCGTTCCCTAATCATACCGCACC<br/> GTTGTATGGAGACCTGTCAGGTAATGGGCTATACCATCCCCAAGGG<br/> TACCGATATACACGTGAATACTTATGCTATTGGAAGGGATCCGAGAG<br/> ATTGGATCGATCCCCTAAAGTTTCTTCCAGAGAGGTTTCTGGATAGT<br/> AATTTAGATTACAACGGGAATCACTTTCAATTCCTTCCCTTTTCCGCA<br/> GGAAGACGTTCTGCGTCCGTATGCCCTGGCCGTACGTACCATTTC<br/> CACTGGTCTTAGCTTCTTTGGTACATGTGTTTACTGGAAGTTGGCG<br/> GAGGCCATACCTGTAGAGAAGCTGGACTCTGAGGAAACCTTTGCCA<br/> TGACCATGTCCAAGGCTCAGCCTTTAAGAGTAATACCGAACATAAGG<br/> CTT</p> |
| <i>ySiCNMT2</i>     | <p>ATGGAAGCACCCCAACGTAATCGTGCGGAAGTAACGGAGGTGATGC<br/> GTAAGTTAGGTTTGGGGCTGATACCTGACGAGGAGCTTCGTTCACTA<br/> ATCAGCGTGCAAGTGGAAAGGAGATTGAGATGGGGATACAAGCCTA<br/> CCTTTGAACAGCAGCTTGCCAGCTGGTCCAATTCGTGCATTCACTA<br/> AAACAAATGAGTATCTCCCTAGAGGCAGAAGTTTTGGAGTCTCAAGT<br/> GTACGAAATTCCTAATCTTTTTATGAAATTGTTGCACGGCTCCAGTAT<br/> GAAGGCCAGCTGGTGTTTTTTTCATCAACGACTCAACCACCTAGACG<br/> AGGCTGAGATTGCAATGTTGGAATTGACTGCGATCGTTCCAGATT<br/> CGTGACGGTGATAGGGTTTTAGACCTAGGGTGTGGCTTCGCGCCT<br/> TGGCGACATATATCGCGAGAAAATACCCCAACTGCCAAGTTACGGG<br/> CGTCACTAATTCAGAATTTCAAAAAGAGTTCATCGAGGAGCAATGCA<br/> AAAAAGATAAAGTCAATGTAGAAGTGATTCTTGCCGACGTCACA<br/> ACCCTTGAAATGGATAAAGAATTTGACCGTGTTATGGCTATTGGAGT<br/> AATAGAACATATGAAGTCCTATGAACTGCTACTGAAGAAGATCTCCA<br/> AGTGGATGAAACAAGATGGATTGCTTTTTGTGGACCATATTTGTCATA<br/> AAGCCTTCGCTTATCATTTTTGAGCCAATTGGCGAGGAGGACTGGATA<br/> GAGGAATACATTTTCCAGGAGGAGTTATGACAATTCGGTCCGCTGA<br/> TCTGTTGCTGTATTTTTCAGGACGATATTAGTGTGTAACCCTGGG<br/> CTGTCAATGGTAAACATTATCCCGTACTAATGAGGAATGGTTGAAG</p>                                                                                                                                                                                                                                                                                                                                                                                                                                                                                                                                                                                                                                                                            |



|                |                                                                                                                                                                                                                                                                                                                                                                                                                                                                                                                                                                                                                                                                                                                                                                                                                                                                                                                                                                                                                                                                                                                                                                                                                                  |
|----------------|----------------------------------------------------------------------------------------------------------------------------------------------------------------------------------------------------------------------------------------------------------------------------------------------------------------------------------------------------------------------------------------------------------------------------------------------------------------------------------------------------------------------------------------------------------------------------------------------------------------------------------------------------------------------------------------------------------------------------------------------------------------------------------------------------------------------------------------------------------------------------------------------------------------------------------------------------------------------------------------------------------------------------------------------------------------------------------------------------------------------------------------------------------------------------------------------------------------------------------|
|                | <p>AGGTTAGATGGGAACGCGGACGCAGCTAGGGCCATTTTGGAAAGACA<br/> GTCTAGGGTCAAAGGAGGAGGCGATGAAGATGCTGAACTACTGGAG<br/> GACTTTTTGCTTTTATGGAATGGAACATGCAAATACAACAACGGTGA<br/> AGAGTGGATGTCAGCCCACGTTTTGTTCAAAAAGAAA</p>                                                                                                                                                                                                                                                                                                                                                                                                                                                                                                                                                                                                                                                                                                                                                                                                                                                                                                                                                                                                                       |
| <i>yNnOMT5</i> | <p>ATGGAGGAAGACATGAAAGCACAAGCGCAGGTCTGGAAACATATAT<br/> ATGGATTTGTCGAATCCTTTACCTTAAAGTGCGCTATCGAGTTGGGT<br/> ATCGCTGATATTTTATATGAACATGGTCAGCCGATGACGCTGAGTGA<br/> GCTGGCTAGCAGCATAACCCCTACCATCTGTCTCTCAGGACGGTCTAT<br/> ATCGTGTACTAAGATACCTGGTTCATATGAAATTGTTTGACCTACAGG<br/> TCGATTGAGATGGCCTGAAAAAGTATAGGTTGACGCCGGCTTCAAAA<br/> TTGCTAGTAAAAAATCAAGAAAAGAACTTGGCCTCCTTTGTCTTGCTA<br/> CAGCTTTACGAGATAGACACGTGGAACCATTTAAGCGCGGGCTGTCTG<br/> AAGGTACTGTTACGCCATGGGAAAAATGCCATGGTGGCGTCTGACTA<br/> TATCGAATACTTTAAAAAAGACAGTGTGGCCAACAGTTATTGTCCGA<br/> TGCGATGACCTCCCATACATCAATGGTCACAGACGCCTTAGTGAAAG<br/> GGTGAAGAAAGCCCATATCTTGGACGGAGTGGGTCACTAATCGA<br/> TGTGGGAGGTTGTACGGGCGTTGCTGCAAGAGCTATCGCCAAGTGG<br/> TTTCCTTCAATAAAGTGTGCCGTTTTTCGATCTTCCGCATGGGTAGC<br/> GAACGCCCTGAGTGTCCAGAGGTCACTCGTATAGTGGAGATATG<br/> TTTGTCTATCCCTAAGACGGATGTAGTCTTTATGAAGTCTGTGTTG<br/> CATGACTGGGGTATGAAGACTGCGTCAAGATCCTAAAGAAGTGCA<br/> AGGAGGCCATTAGCGAAAAAGTGGGAAGGCAGTGATAGTTGACAT<br/> CGTCATGGACGTTGAATCATCTCCTAATGAATTTACAGGCGCTAGGT<br/> TAGGCATGGAGATGGATATGCTGGTTGCAGTGGGAGGTAAAGAAAG<br/> GAGTAAAAAGAATGGCATAAGCTATTTAAGGAAGCTGGGTACTCCG<br/> GATACAAAATTACTCCCATAGTCGCAATAGAAAGTATCATTGAGGTG<br/> TTCCCTGA</p>               |
| <i>yCt7OMT</i> | <p>ATGGAGACGATTCTTCAAGGTCAACAGAACATTAATAAATTACTATTT<br/> GCATTTGCGGATACGATGGCTTTAAAATGCGTAGTCGAGCTGCGTAT<br/> CGCCGACATTATCAACAGTCATGGGCTGCCTATAAGTTTGTGAGAAA<br/> TCGCTGCGGGCATAACAATCCACCAGTTCAGTTCCTTCTCCCCCGAAT<br/> ATAAACTACCTTTTTAGGATAATGCGTCTGCTGGTTCGTAAGGAGTT<br/> TTCTCAAGTCATGCGCCTAATCAAACGAAGAAACACTGTACGGTTT<br/> AACTAACAGCTCTAAGTGGTTGCTAAGGGACGCTAACTTTTTCAATGA<br/> CACCAATAATTCAGGCGCTGACCCATCATTGTAGTATGGATTCATTC<br/> CATAAGCTAAATAAGTGCCTTGAAGAAGGAGGTTATGCGTTTGCCAA<br/> AGCCAATGGTTGTGAAATATGGGAATTTGCTTCCATGAACCCGGAAT<br/> TCAATAGACTGTTCAACTCAGCGATGGCTTCTACCTCCAAGATAGCG<br/> GTTGACGCTATTCTAAGCGGATATAAGAATGGATTGACGGGTTACG<br/> TTCCTTAGTCGATGTAGGAGGCGGTACAGGAACATTGATTGGGGAG<br/> ATAGTAAAAGCCTATCCTCACCTAACCAGGACCAATTTTGACCTACC<br/> TCACGTAGTTGCTACAGCACCAAGAACACTGGGGTAGTTCACGTC<br/> GGTGGGGACATGTTTCGTCGAAATTTCCACGCGGACGCAATCATT<br/> TGAAGTGGATTCTACATGATTGGAATGACGAGGATTGCGTGAAGATT<br/> TTAAAGAAGTGCATAAGGCCATAGCGAATAGGGGCGTAAAAGTAAT<br/> CATTGTGCAAATTTGCTGCAACCGGATGGAGTTGCGCCATTAGAC<br/> GAAACTAGGCTAATTTTCGATCTGTCAATGATAGCACATAGCTCCGG<br/> TGGTAAAGAGCGTACAGAGACAGAATGGGAGAAGCTATTGAGGGAC<br/> GGAGGCTTCAGCAGGCACCGTATAATCCAGATCCCGGATGTCACCA<br/> GCATTATAGAAGCTTATCCT</p> |

## SI References

1. F. Sievers, *et al.*, Fast, scalable generation of high-quality protein multiple sequence alignments using Clustal Omega. *Mol. Syst. Biol.* **7** (2011).
2. M. Goujon, *et al.*, A new bioinformatics analysis tools framework at EMBL-EBI. *Nucleic Acids Res.* **38**, 695–699 (2010).
3. X. Robert, P. Gouet, Deciphering key features in protein structures with the new ENDscript server. *Nucleic Acids Res.* **42**, 320–324 (2014).
4. M. Gu, *et al.*, Crystal structure of CYP76AH1 in 4-PI-bound state from *Salvia miltiorrhiza*. *Biochem. Biophys. Res. Commun.* **511**, 813–819 (2019).
5. K. D. Entian, P. Kötter, 25 Yeast Genetic Strain and Plasmid Collections. *Methods Microbiol.* **36**, 629–666 (2007).
6. T. R. Valentic, J. T. Payne, C. D. Smolke, Structure-Guided Engineering of a Scoulerine 9-O-Methyltransferase Enables the Biosynthesis of Tetrahydropalmatrubine and Tetrahydropalmatine in Yeast. *ACS Catal.*, 4497–4509 (2020).
7. Y. Li, *et al.*, Complete biosynthesis of noscapine and halogenated alkaloids in yeast. *Proc. Natl. Acad. Sci. U. S. A.* **115**, E3922–E3931 (2018).
8. W. Guo, *et al.*, Rational engineering of chorismate-related pathways in *Saccharomyces cerevisiae* for improving tyrosol production. *Front. Bioeng. Biotechnol.* **7**, 1–7 (2019).
9. S. Galanie, C. D. Smolke, Optimization of yeast-based production of medicinal protoberberine alkaloids. *Microb. Cell Fact.* **14**, 144 (2015).
10. S. Alberti, A. D. Gitler, S. Lindquist, A suite of Gateway® cloning vectors for high-throughput genetic analysis in *Saccharomyces cerevisiae*. *Yeast* **24**, 913–919 (2007).
11. S. Galanie, K. Thodey, I. J. Trenchard, F. Interrante, C. D. Smolke, Complete biosynthesis of opioids in yeast. 1–11 (2015).
12. O. W. Ryan, *et al.*, Selection of chromosomal DNA libraries using a multiplex CRISPR system. *Elife* **3**, 1–15 (2014).
13. P. Srinivasan, C. D. Smolke, Engineering a microbial biosynthesis platform for de novo production of tropane alkaloids. *Nat. Commun.* **10**, 1–15 (2019).
14. J. Schmidt, K. Raith, C. Boettcher, M. H. Zenk, Analysis of benzylisoquinoline-type alkaloids by electrospray tandem mass spectrometry and atmospheric pressure photoionization. *Eur. J. Mass Spectrom.* **11**, 325–333 (2005).
15. Y. Kotake, *et al.*, Detection and determination of reticuline and N-methylcoculaurine in the Annonaceae family using liquid chromatography-tandem mass spectrometry. *J. Chromatogr. B Anal. Technol. Biomed. Life Sci.* **806**, 75–78 (2004).
16. S. Zou, *et al.*, Simultaneous determination of five alkaloids by HPLC-MS/MS combined with micro-SPE in rat plasma and its application to pharmacokinetics after oral administration of lotus leaf extract. *Front. Pharmacol.* **10**, 1–11 (2019).
17. S. C. Farrow, J. M. Hagel, P. J. Facchini, Transcript and metabolite profiling in cell cultures of 18 plant species that produce benzylisoquinoline alkaloids. *Phytochemistry* **77**, 79–88 (2012).
